# Supplementary material for: Cell Death Is Not Sufficient for the Restriction of Potato Virus Y Spread in Hypersensitive Response-Conferred Resistance in Potato
Source: PubMed Central journal article supplement (PMC5818463; doi:10.3389/fpls.2018.00168), 2018-02-15
Supplement: FigureS1.pdf [file FigureS1.pdf]

# Dynamics of lesion expansion in NahG-Rywal

DinoLite digital microscopy

**Supplementary Figure 1:** Dynamics of lesion expansion in NahG-Rywal after PVY N605-GFP inoculation. Lesions expansion was followed by DinoLite digital microscope in five independent experiments. We observed unlimited expansion of all analysed lesions.

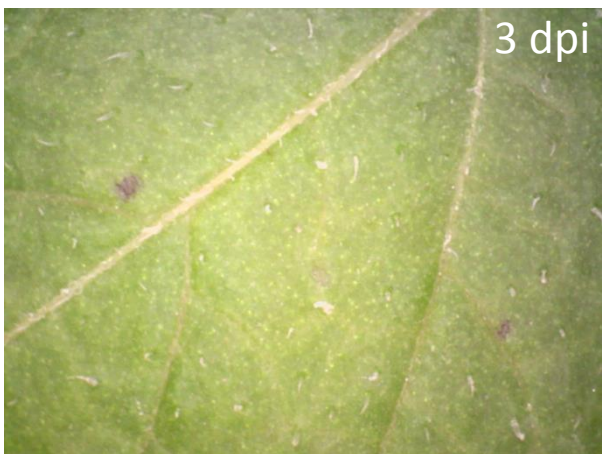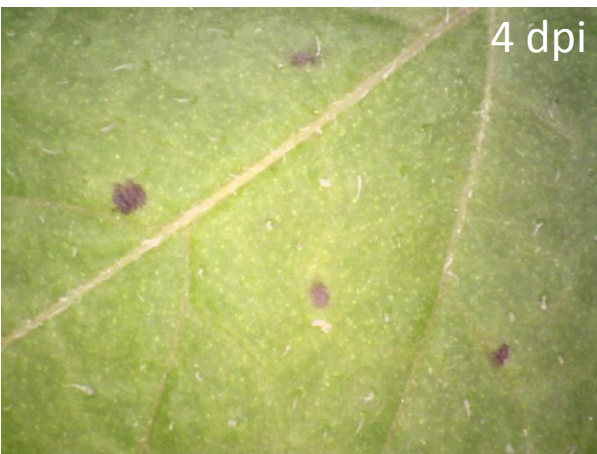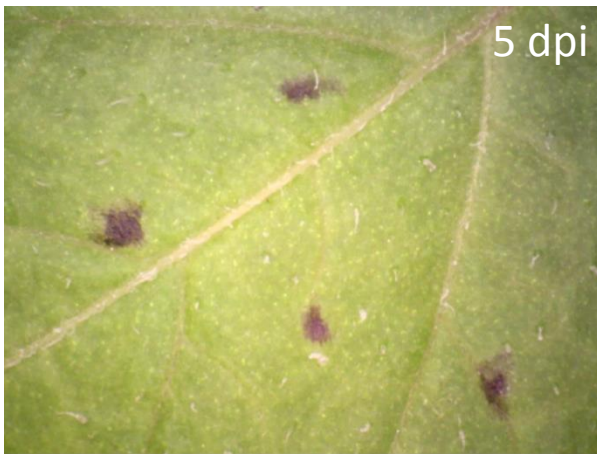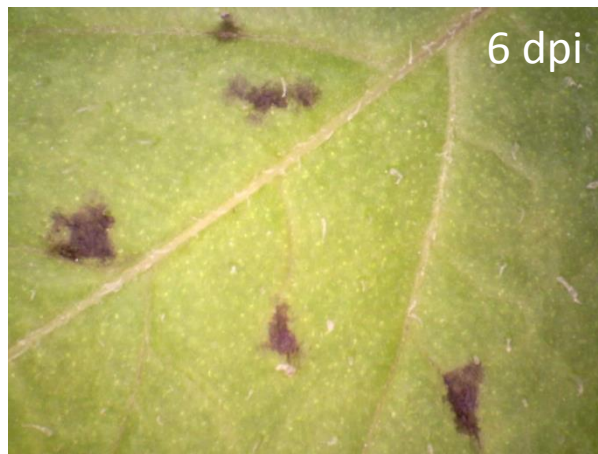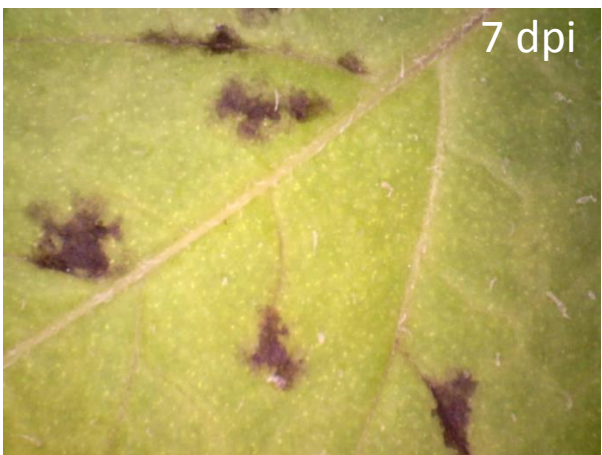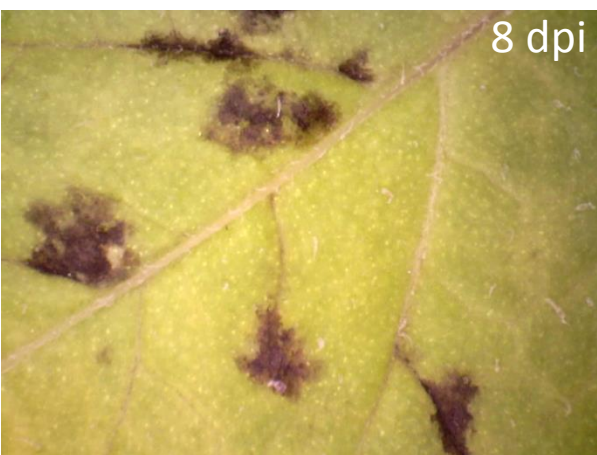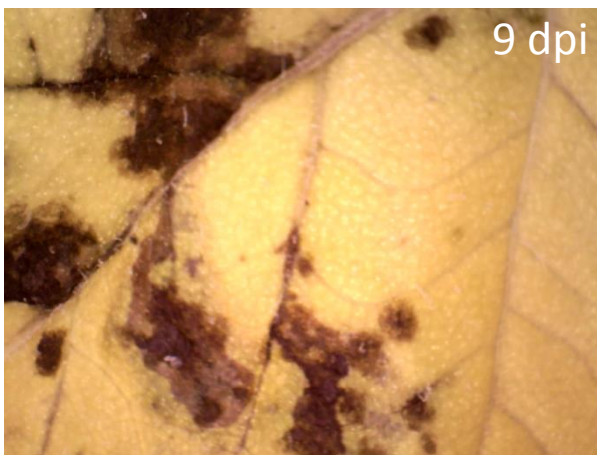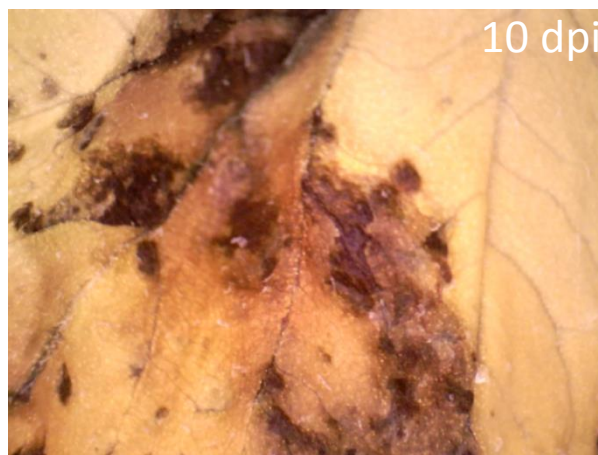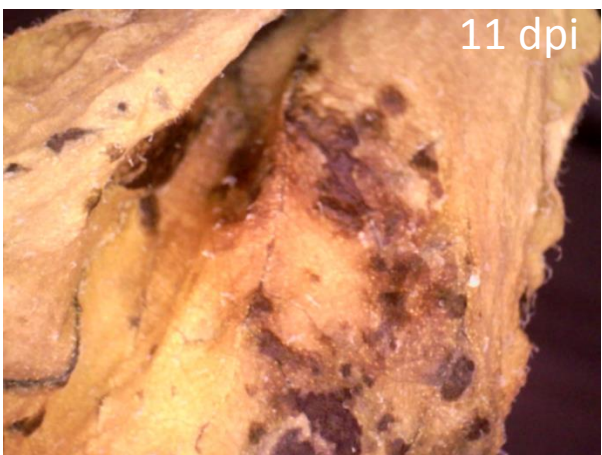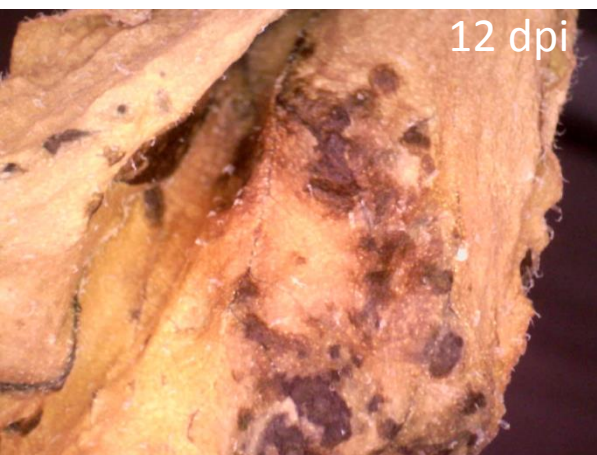

NahG-Rywal  
Experiment 1  
3 dpi – 12 dpi

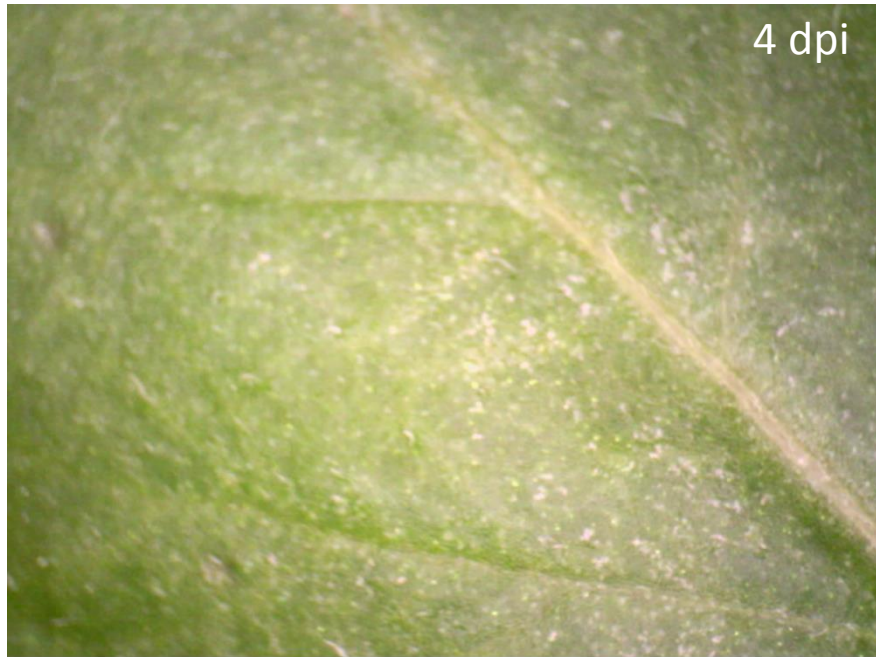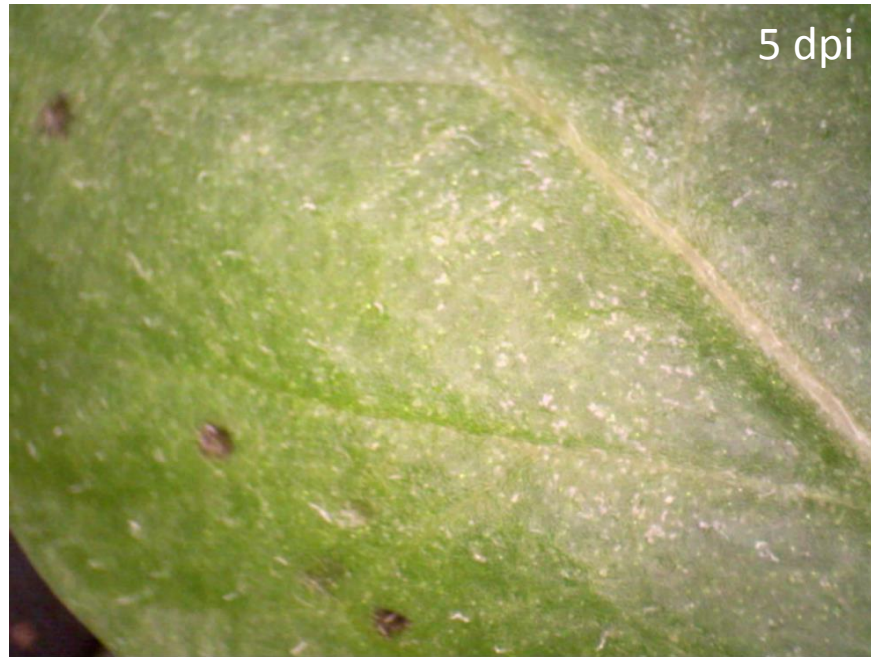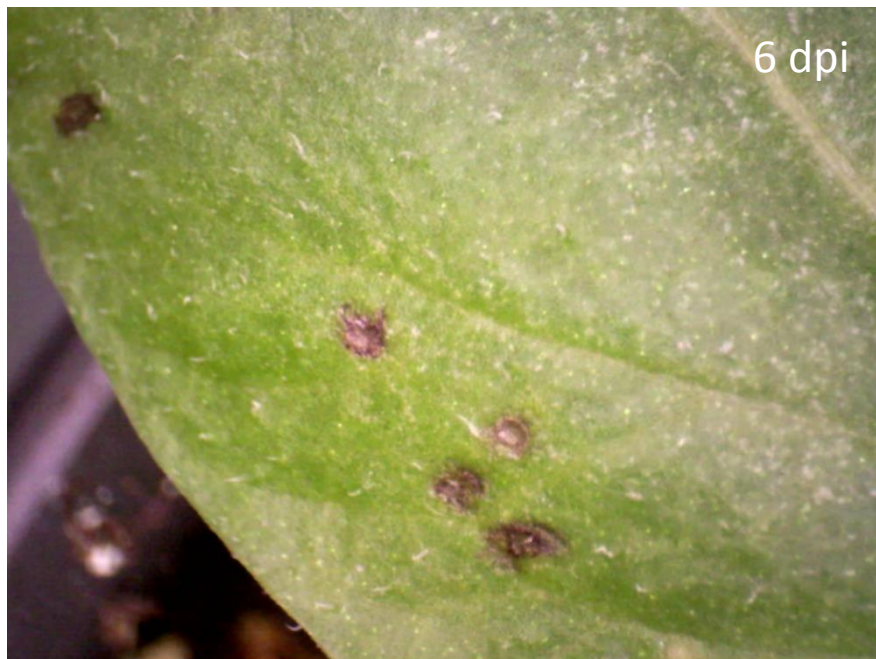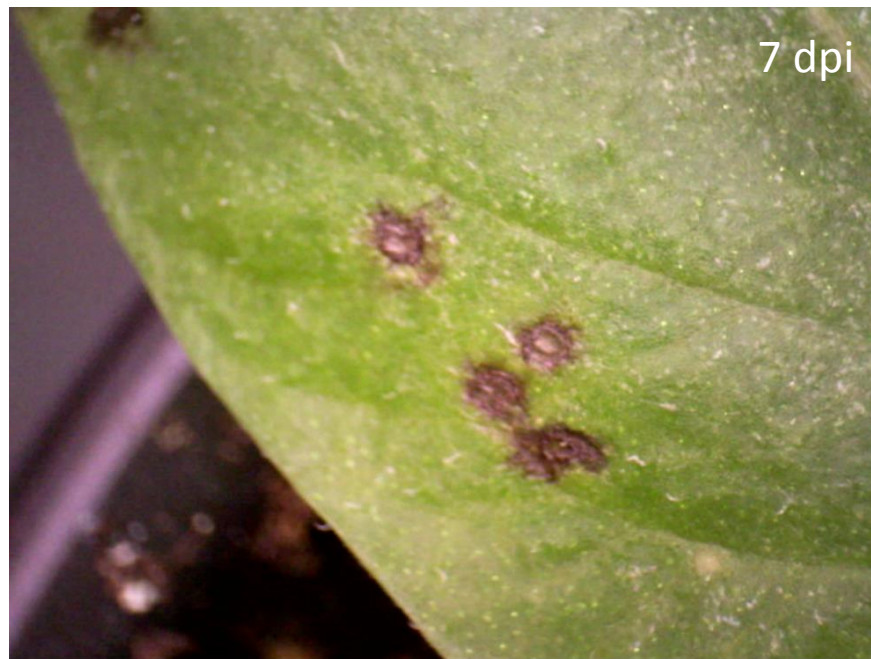

NahG-Rywal  
Experiment 2  
4 dpi – 7 dpi

3 dpi

4 dpi

5 dpi

7 dpi

8 dpi

9 dpi

NahG-Rywal  
Experiment 3  
3 dpi – 9 dpi

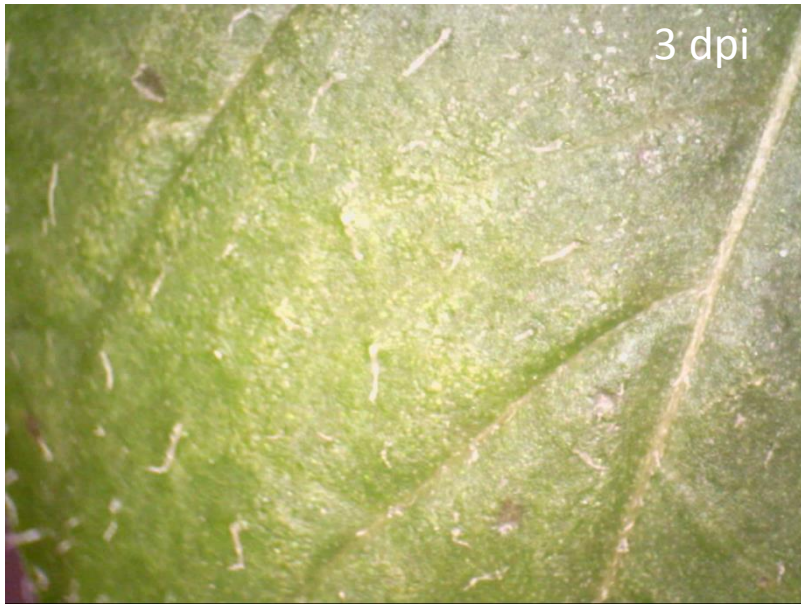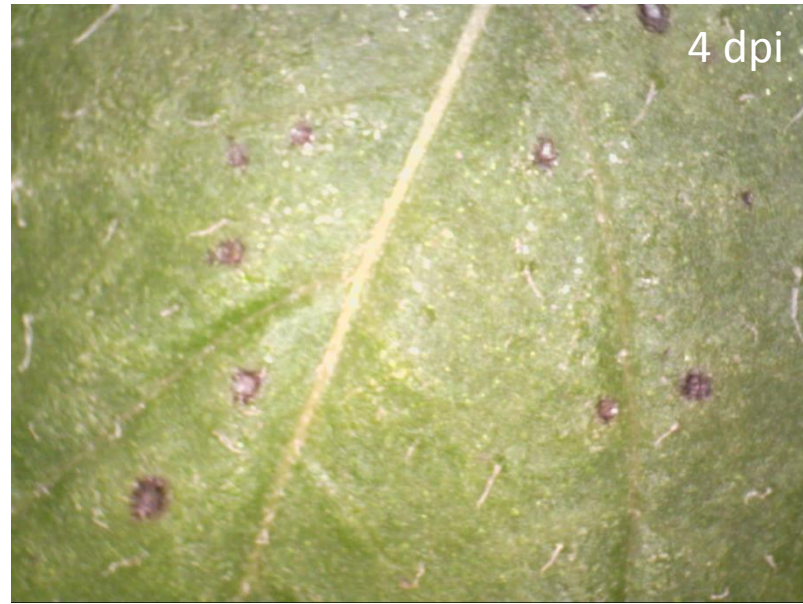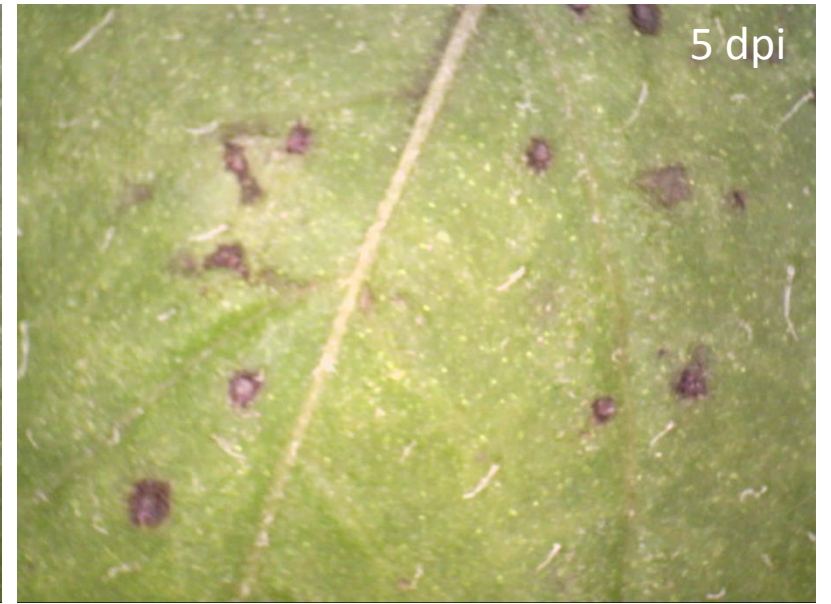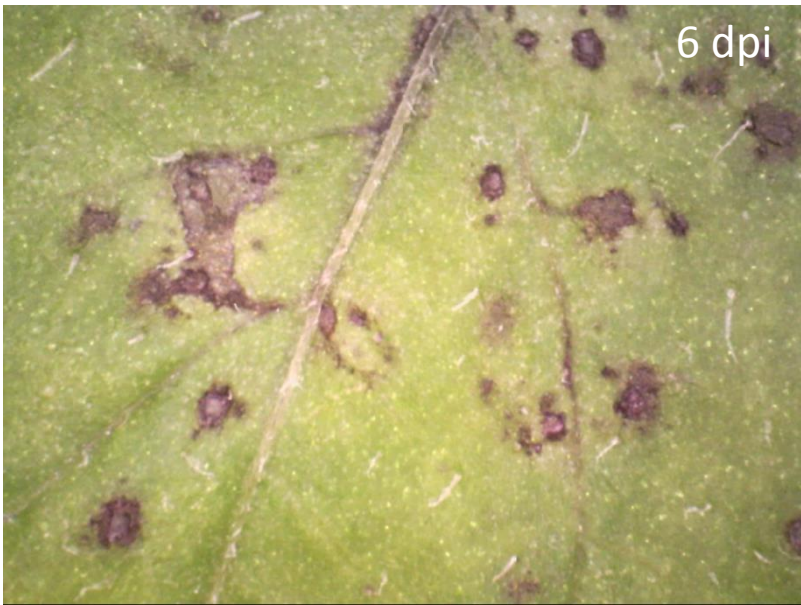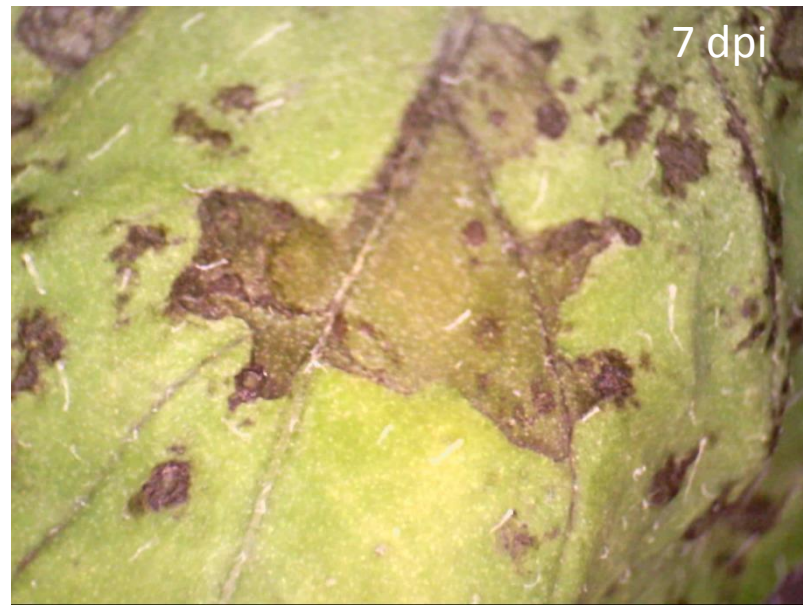

NahG-Rywal  
Experiment 4  
3 dpi – 7 dpi

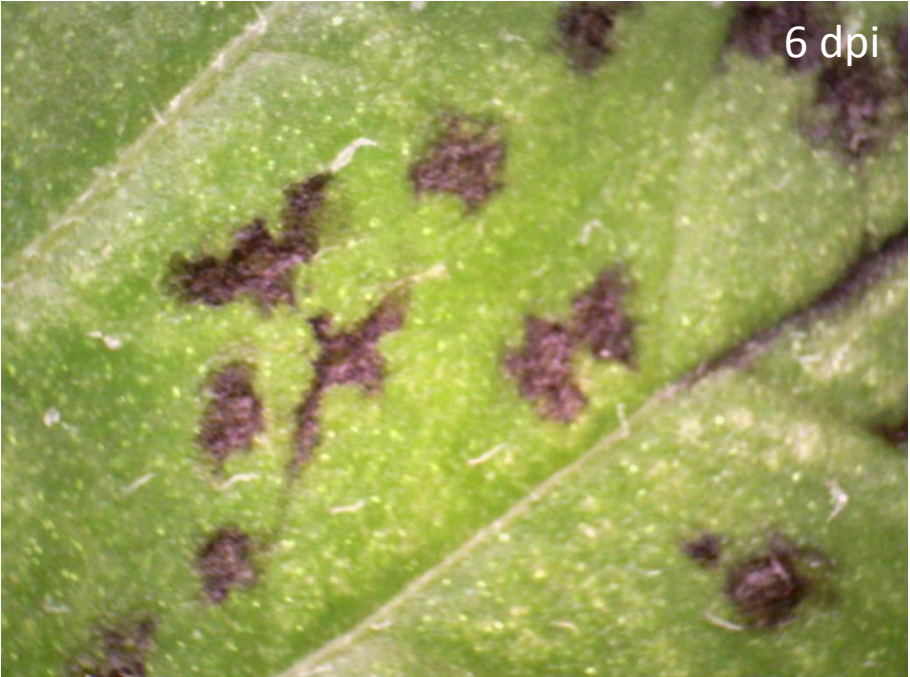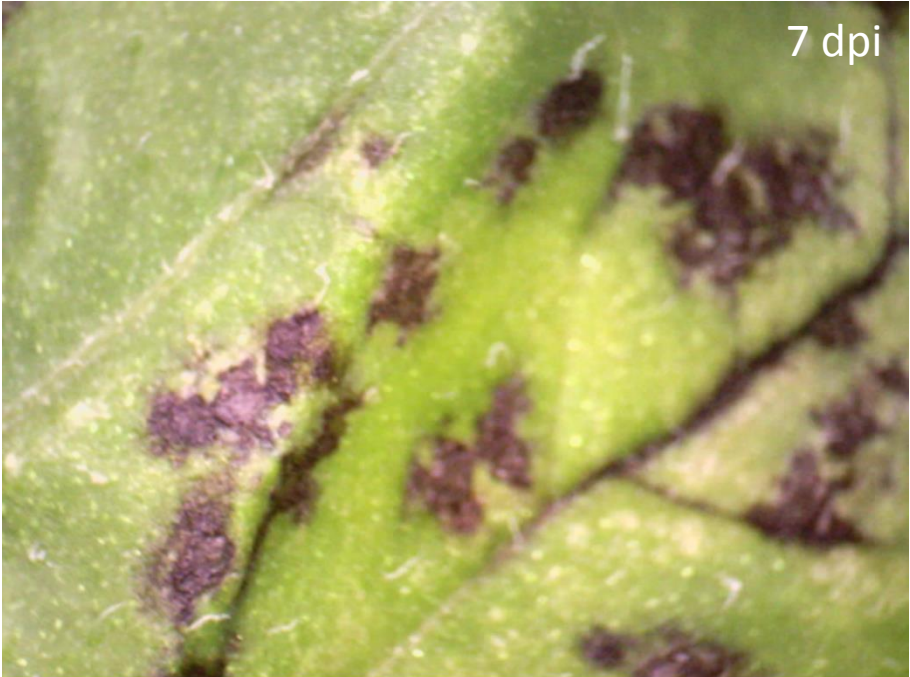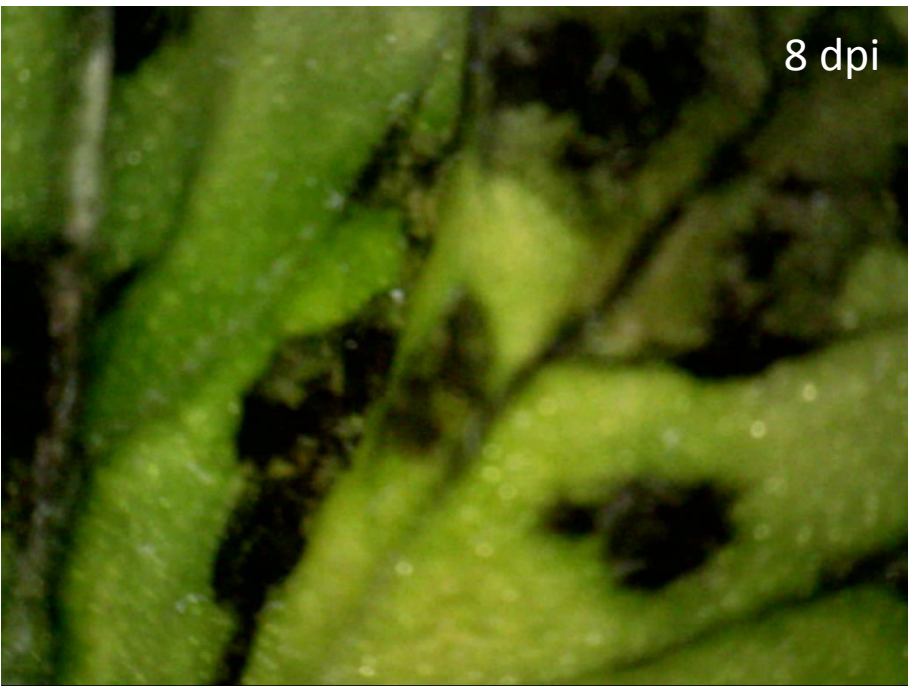

NahG-Rywal  
Experiment 5  
6 dpi – 8 dpi
