# Supplementary material for: Cell Death Is Not Sufficient for the Restriction of Potato Virus Y Spread in Hypersensitive Response-Conferred Resistance in Potato
Source: PubMed Central journal article supplement (PMC5818463; doi:10.3389/fpls.2018.00168), 2018-02-15
Supplement: FigureS2.pdf [file FigureS2.pdf]

# Dynamics of lesion expansion in cv. Rywal

DinoLite digital microscopy

**Supplementary Figure 2:** Dynamics of lesion expansion in cv. Rywal after PVY N605-GFP inoculation. Lesions expansion was followed by DinoLite digital microscope in 13 independent experiments. Black arrows indicate some of the lesions which continuously expanded even in later dpi, while red arrows indicate some of the lesions which became fully developed already in early time points after inoculation.

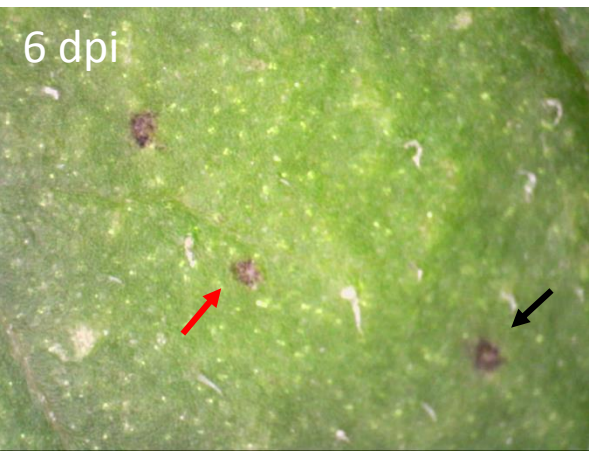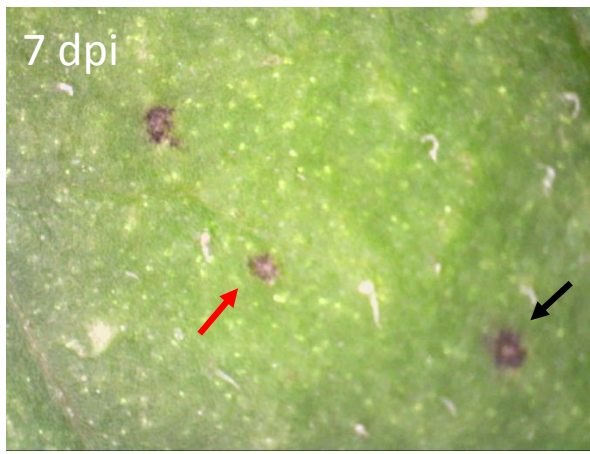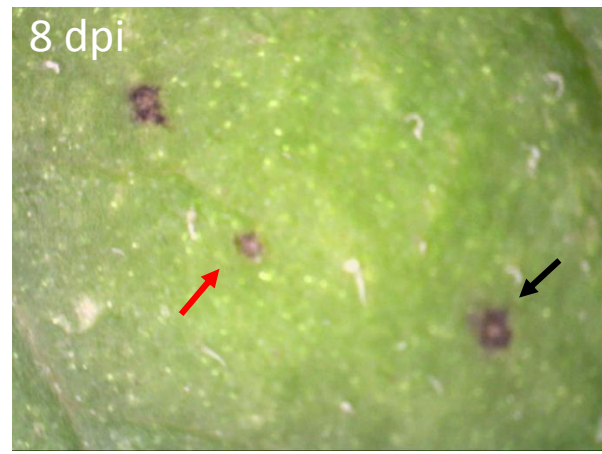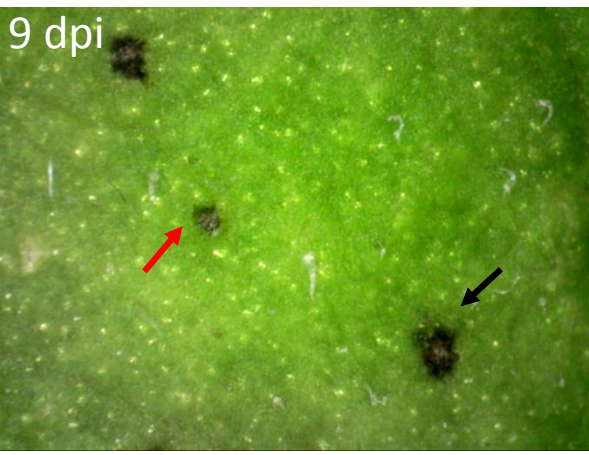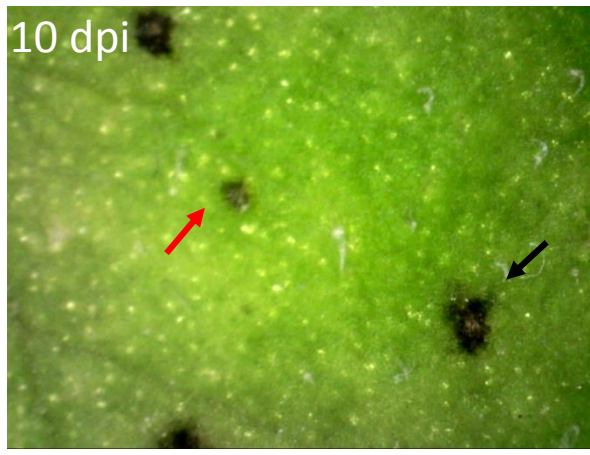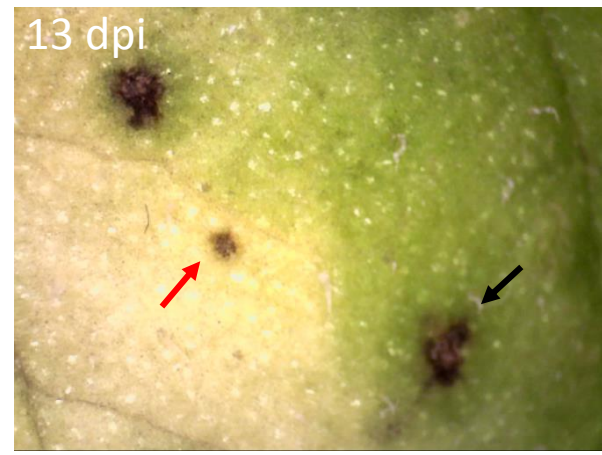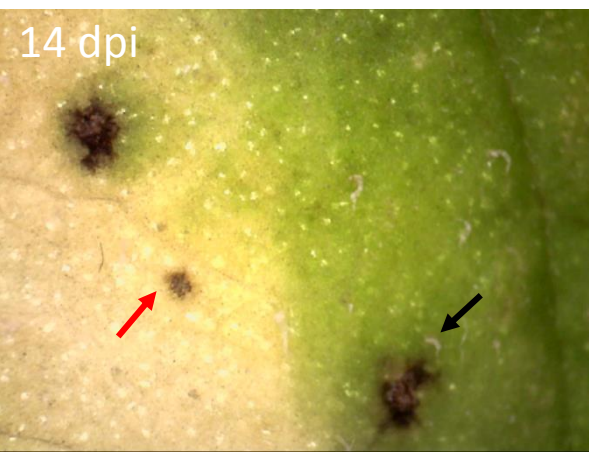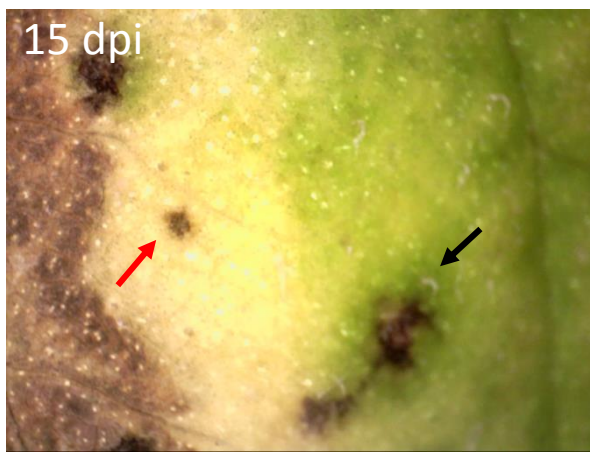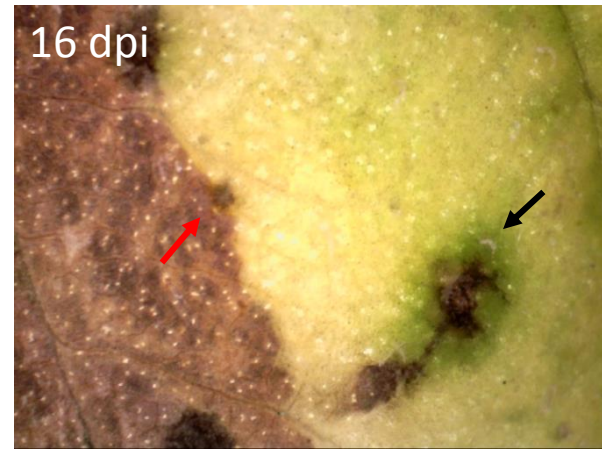

cv. Rywal  
Experiment 1  
6 dpi – 16 dpi

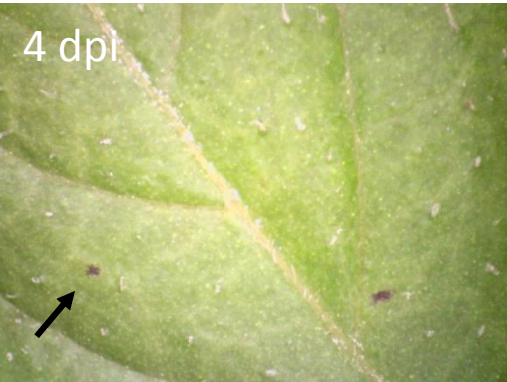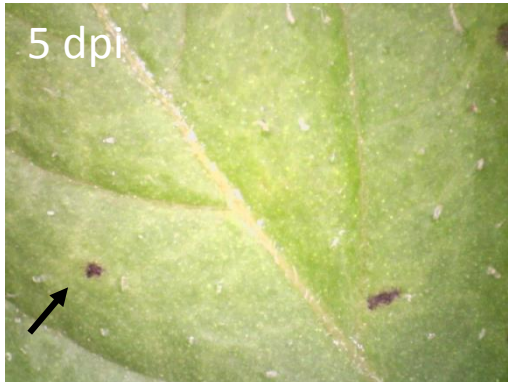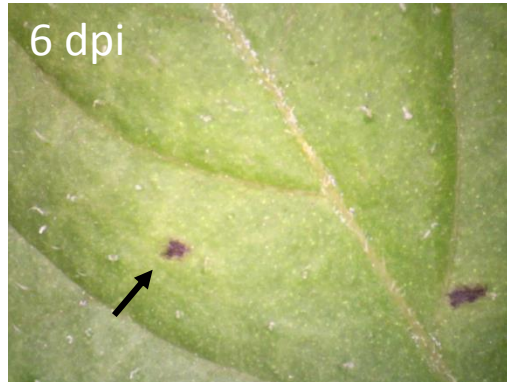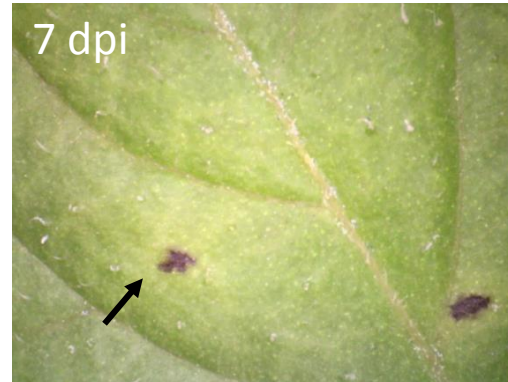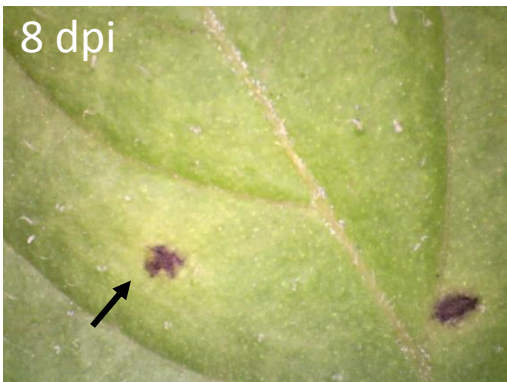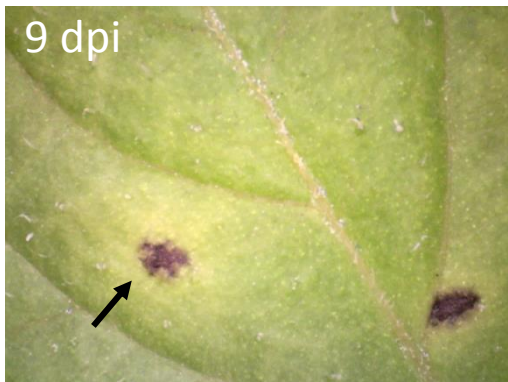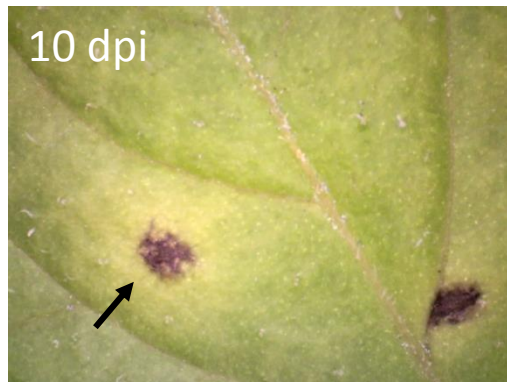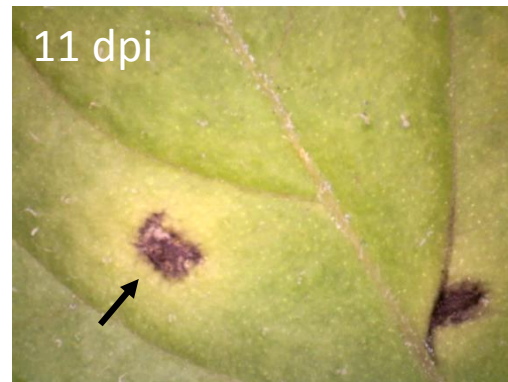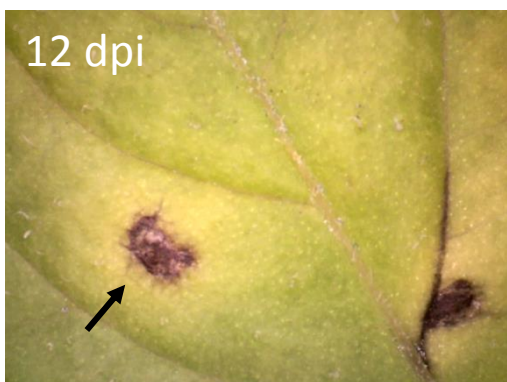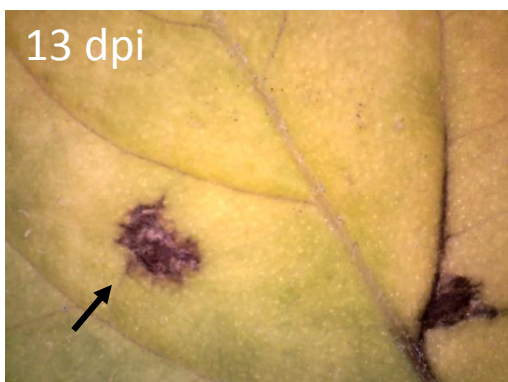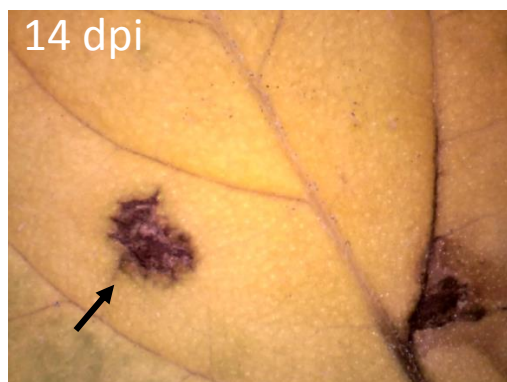

cv. Rywal  
Experiment 2  
4 dpi – 14 dpi

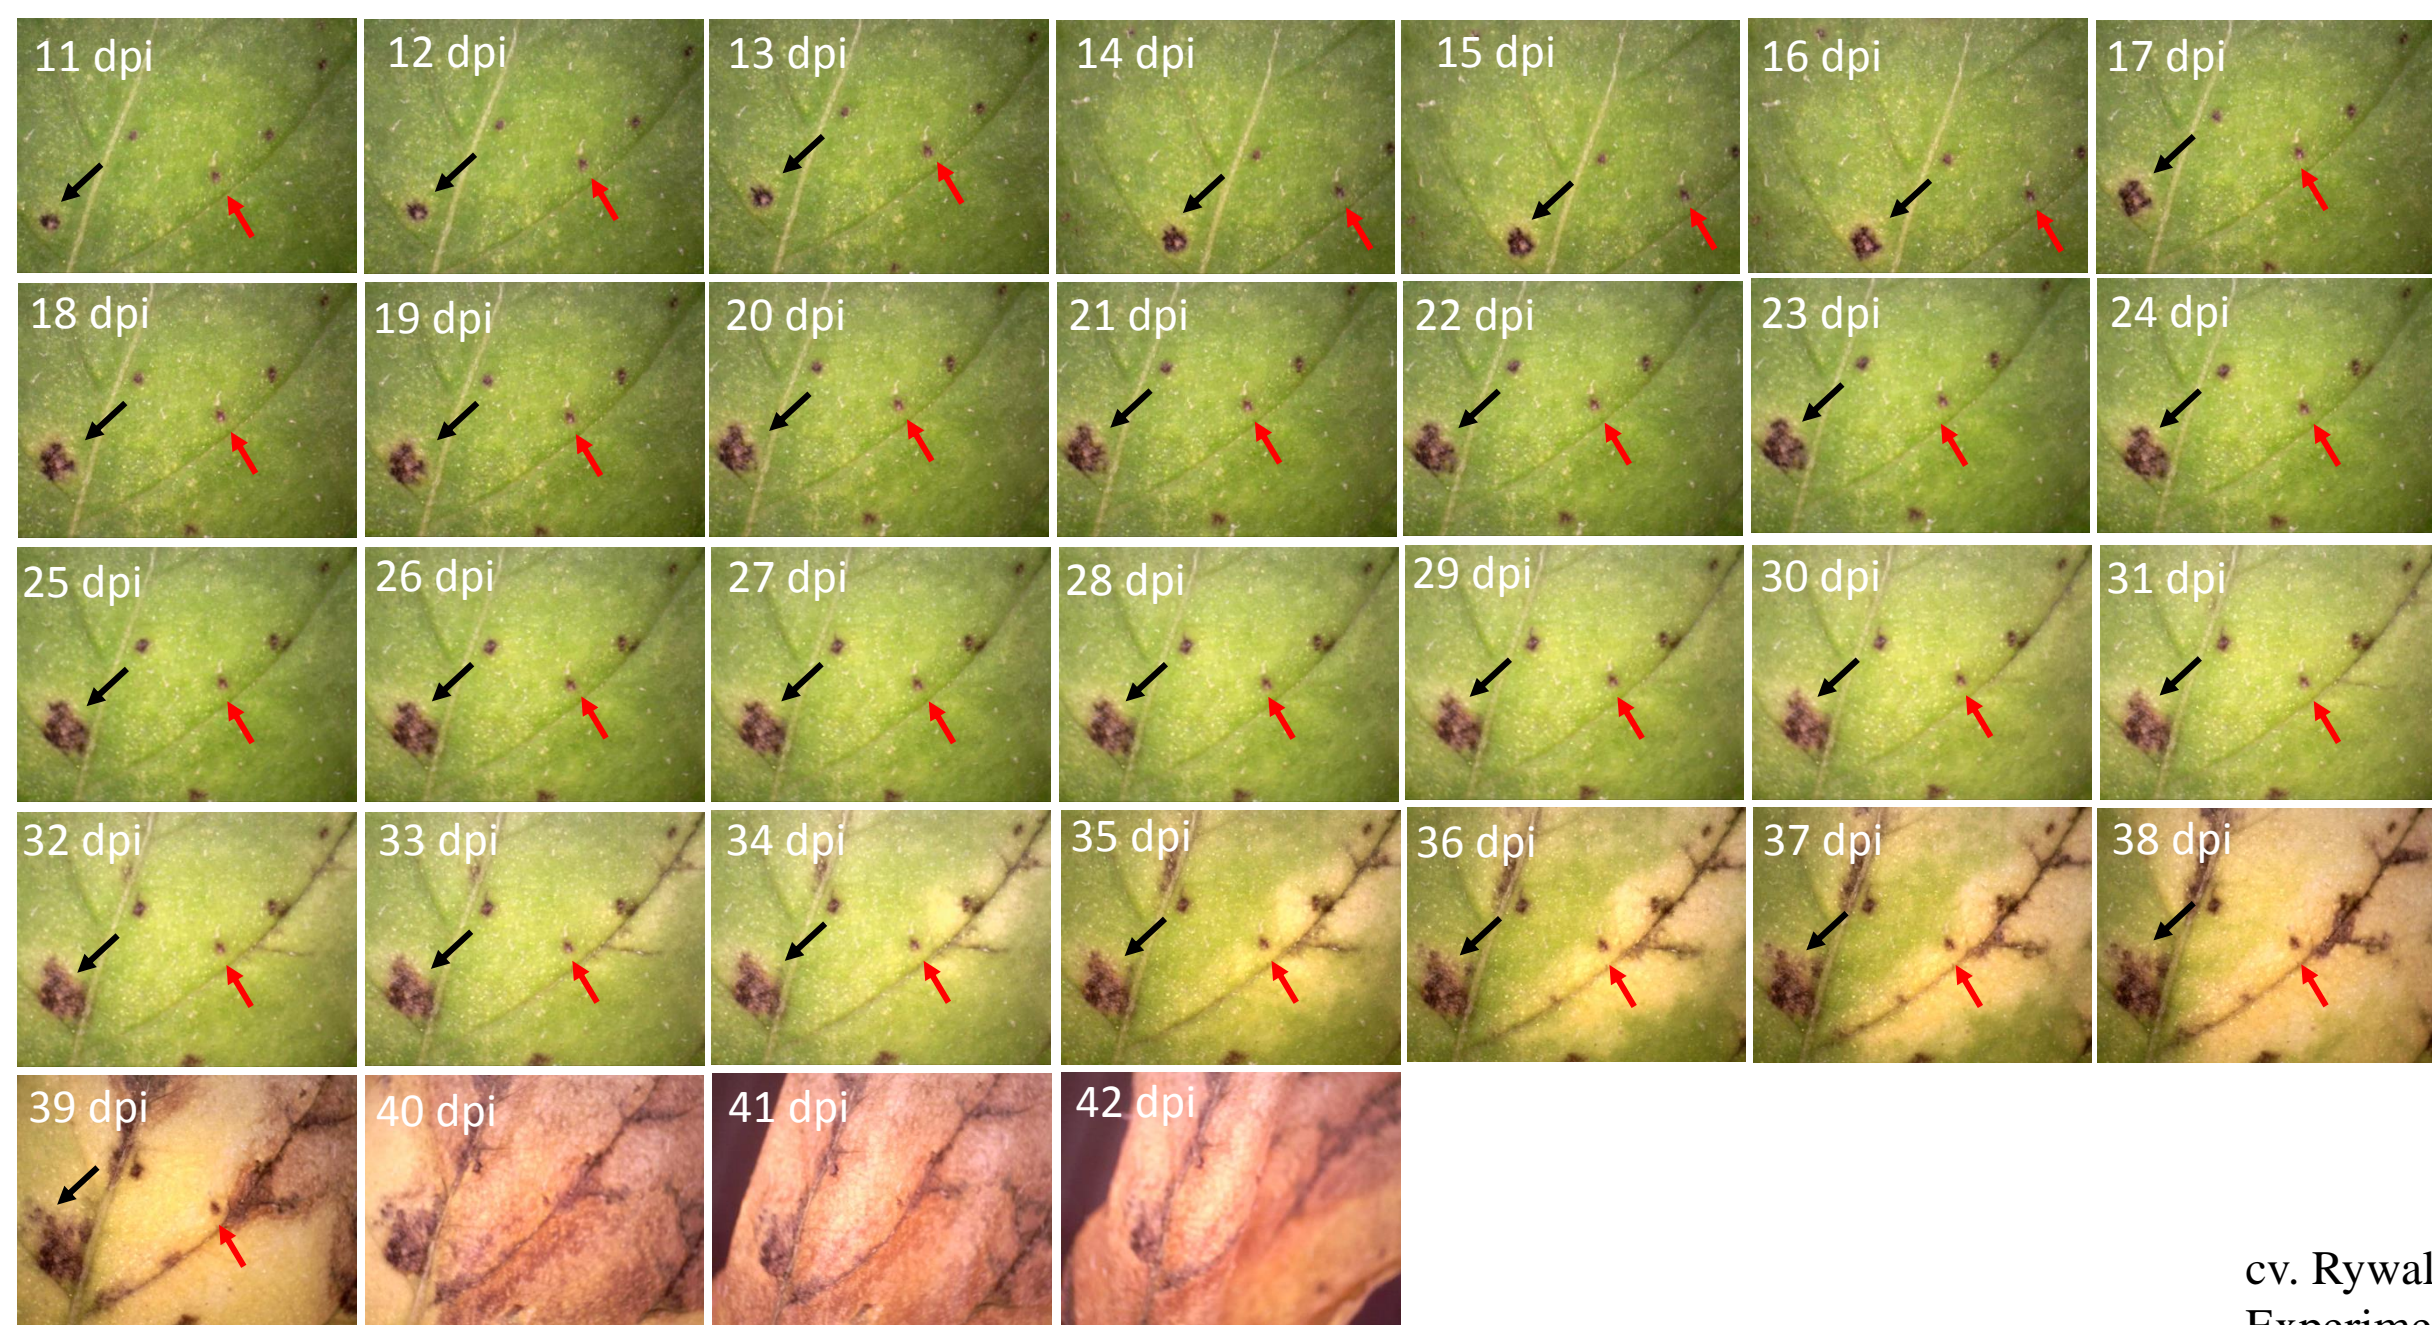

cv. Rywal  
Experiment 3  
11 dpi – 42 dpi

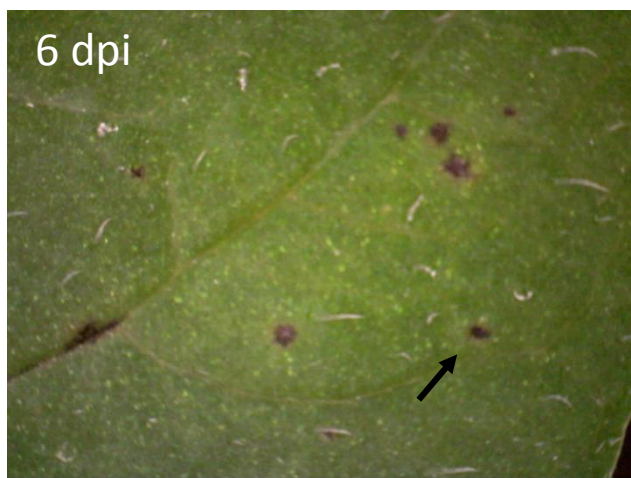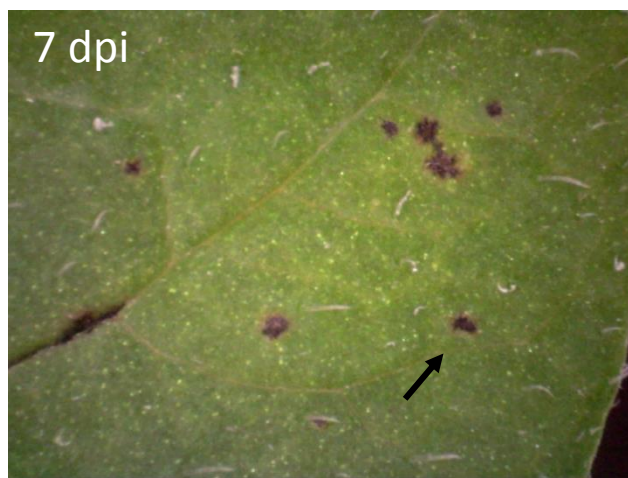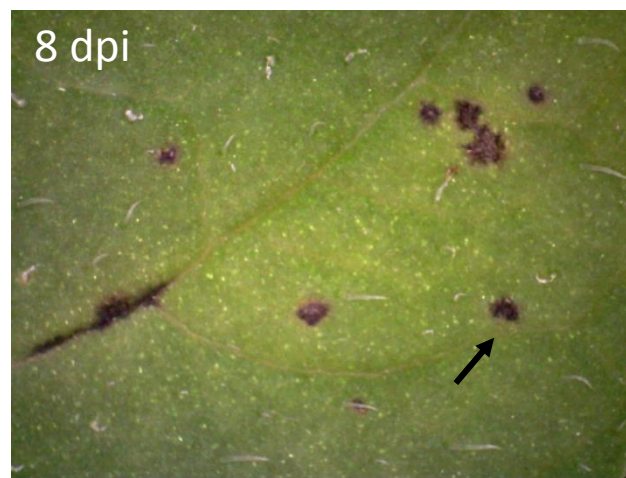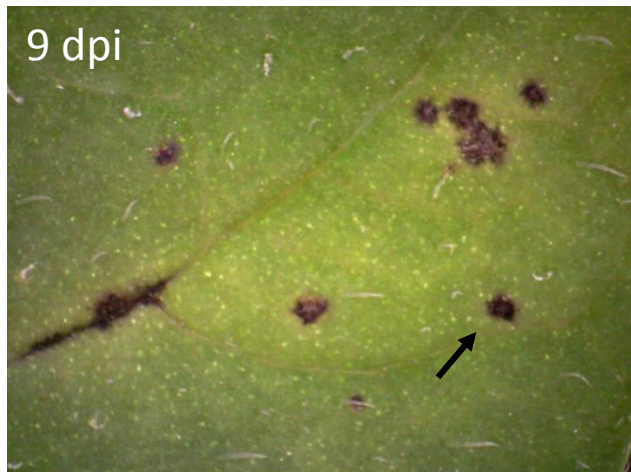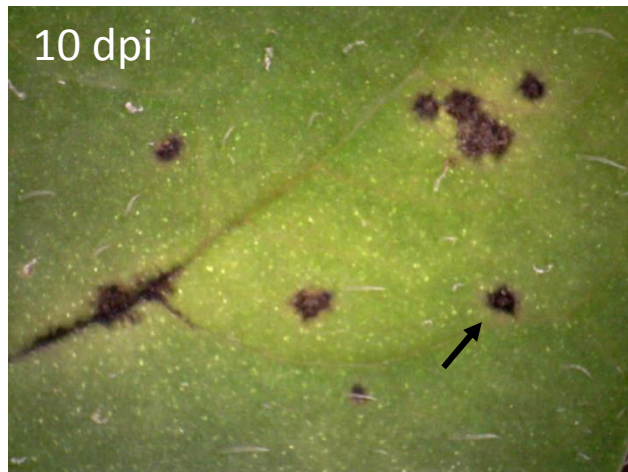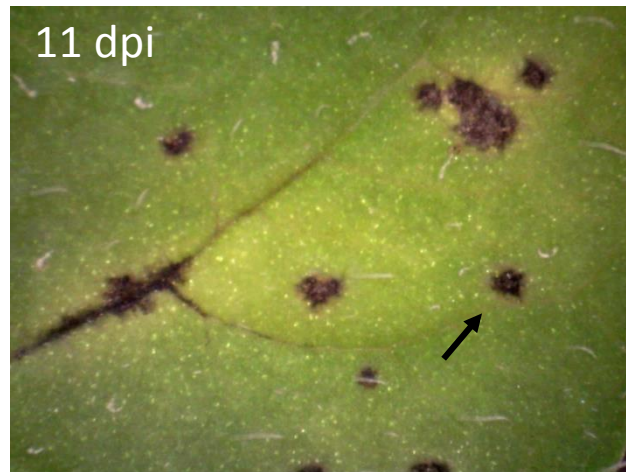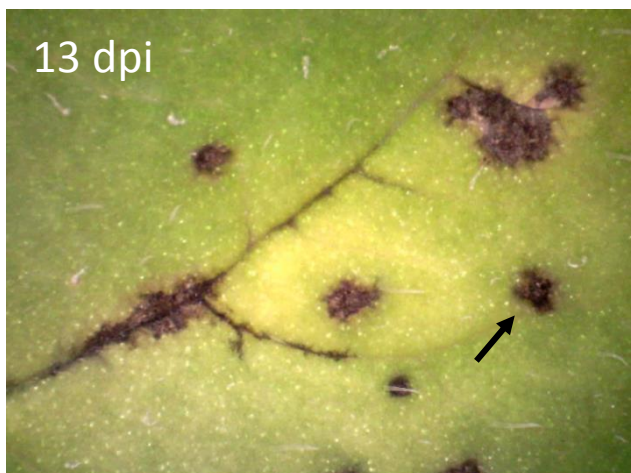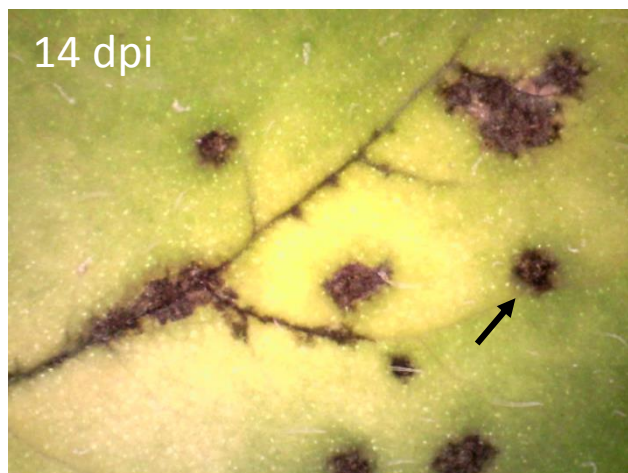

cv. Rywal  
Experiment 4  
6 dpi – 14 dpi

4 dpi

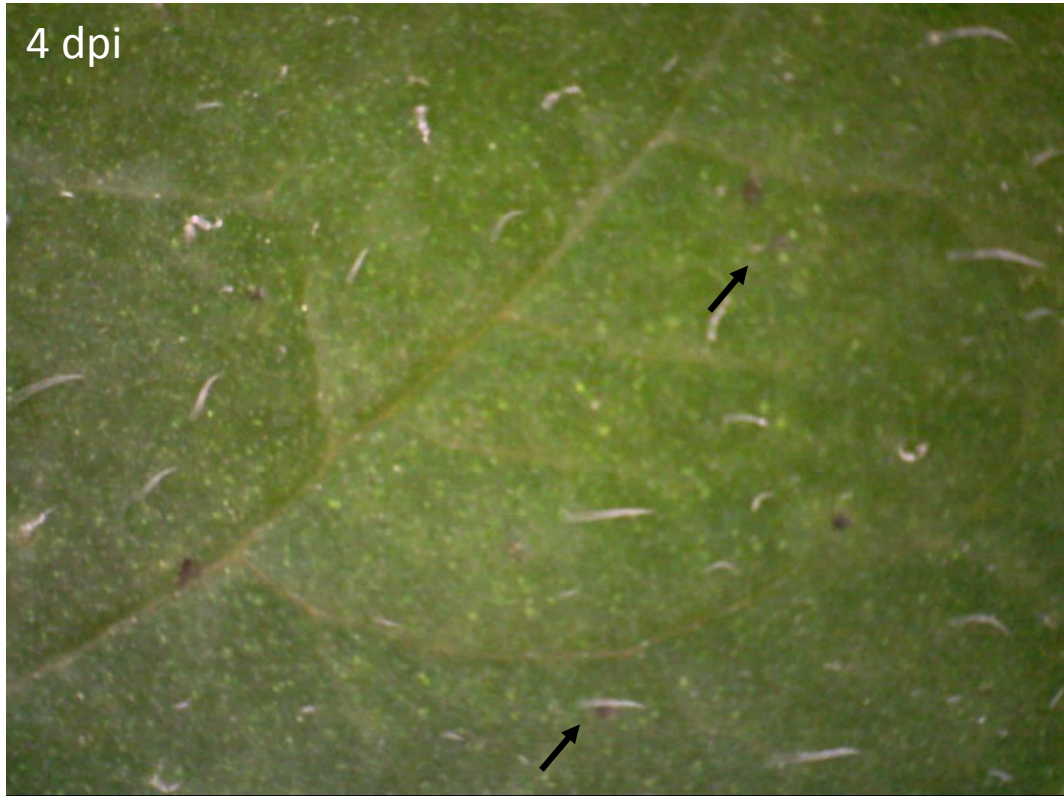

5 dpi

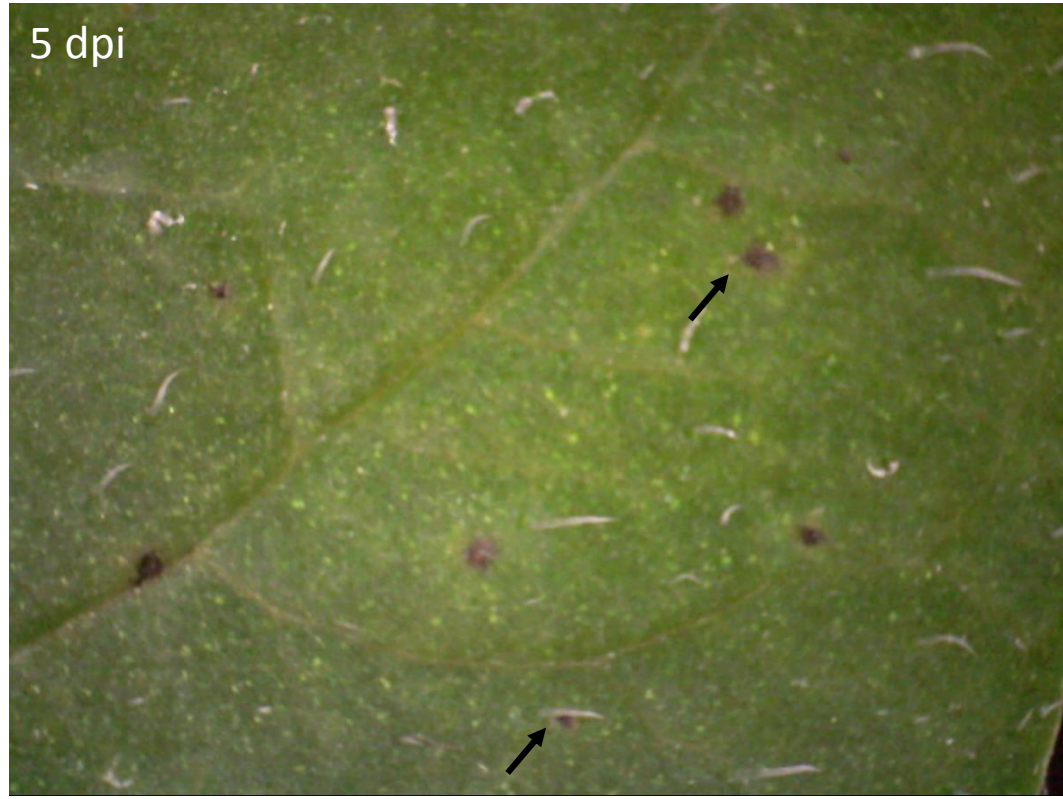

cv. Rywal  
Experiment 5  
4 dpi – 5 dpi

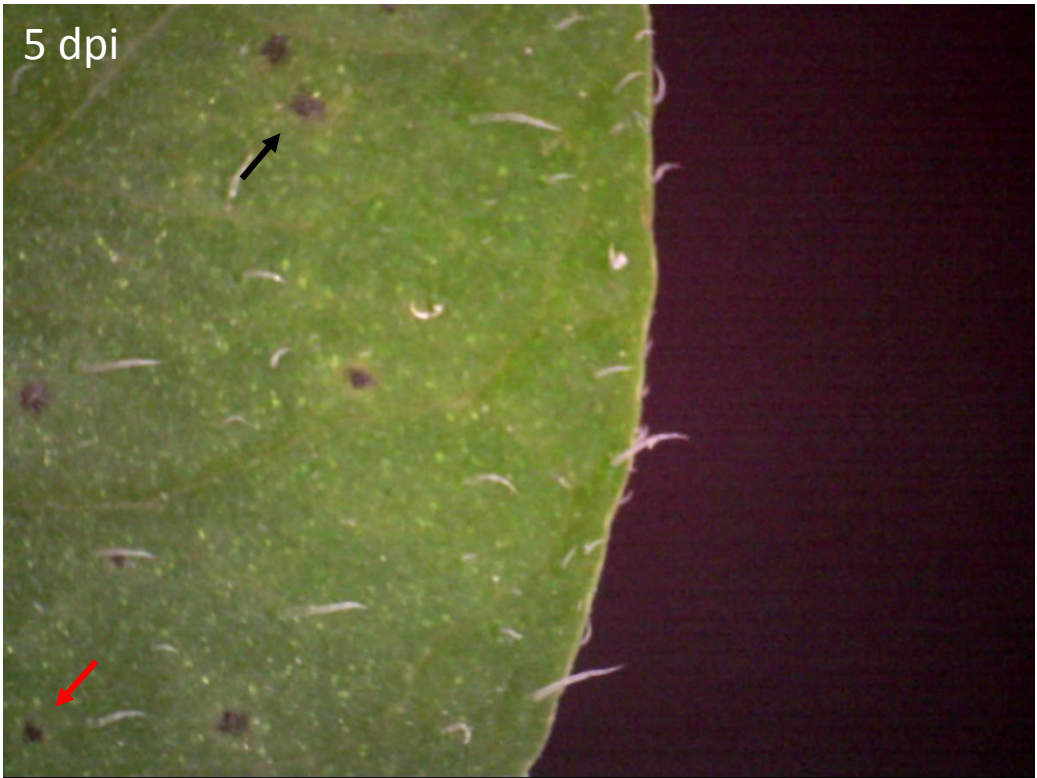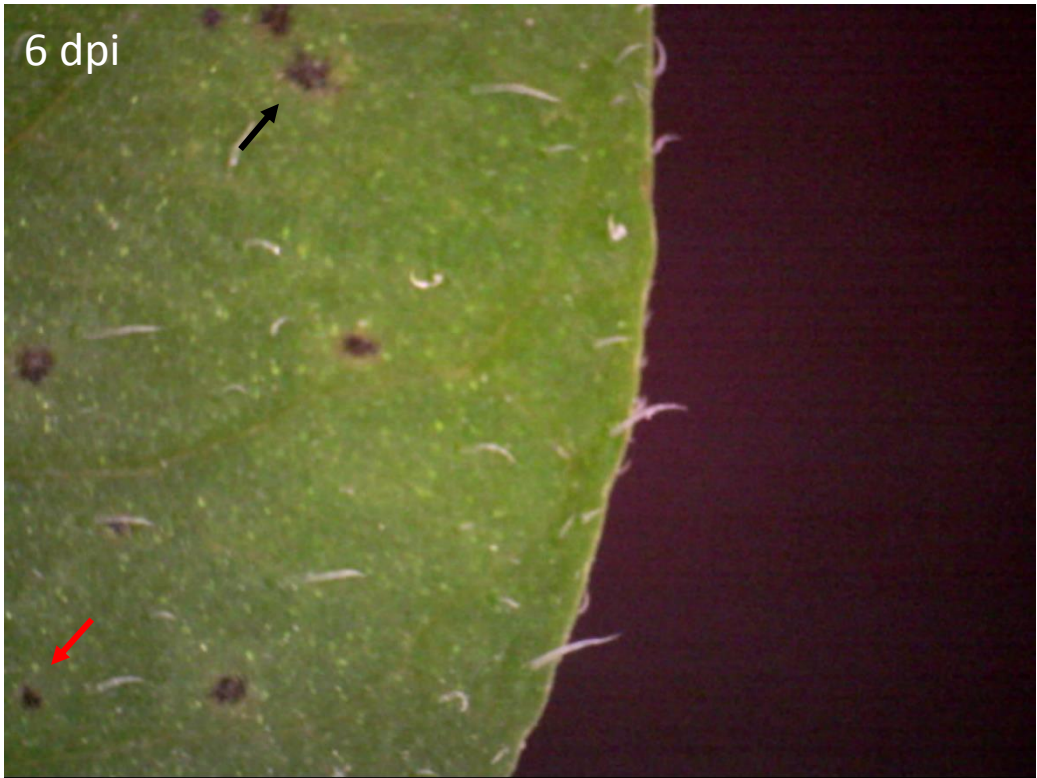

cv. Rywal  
Experiment 6  
5 dpi – 6 dpi

5 dpi

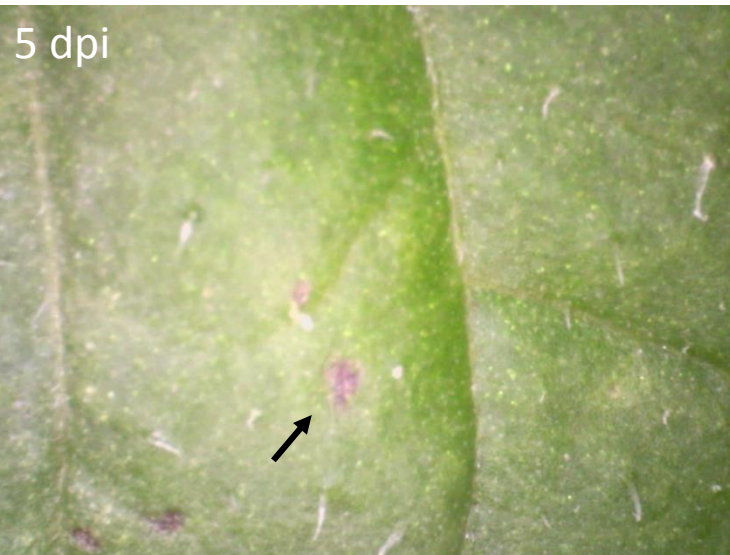

6 dpi

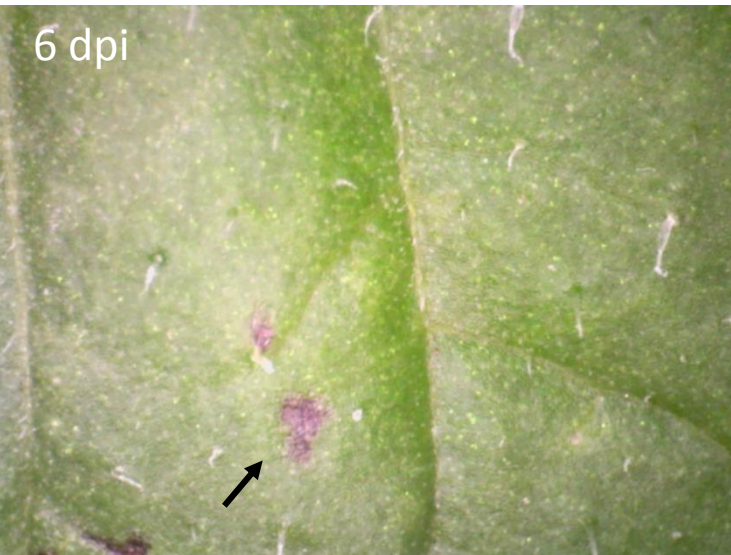

7 dpi

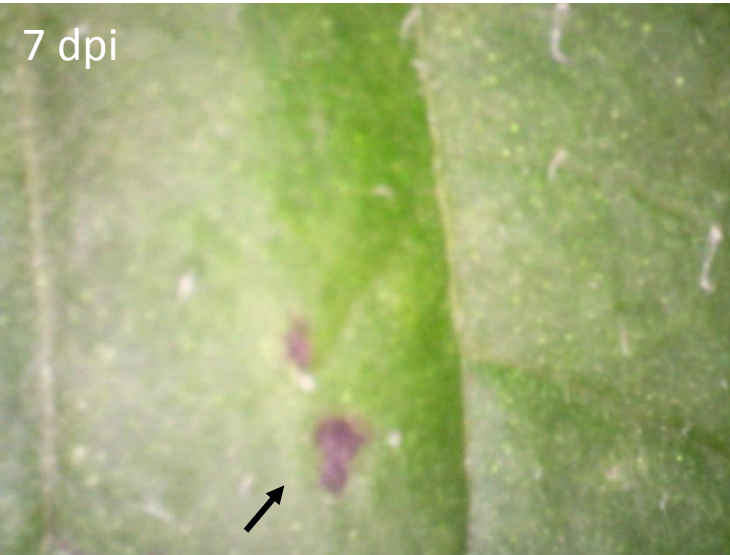

cv. Rywal  
Experiment 7  
5 dpi – 7 dpi



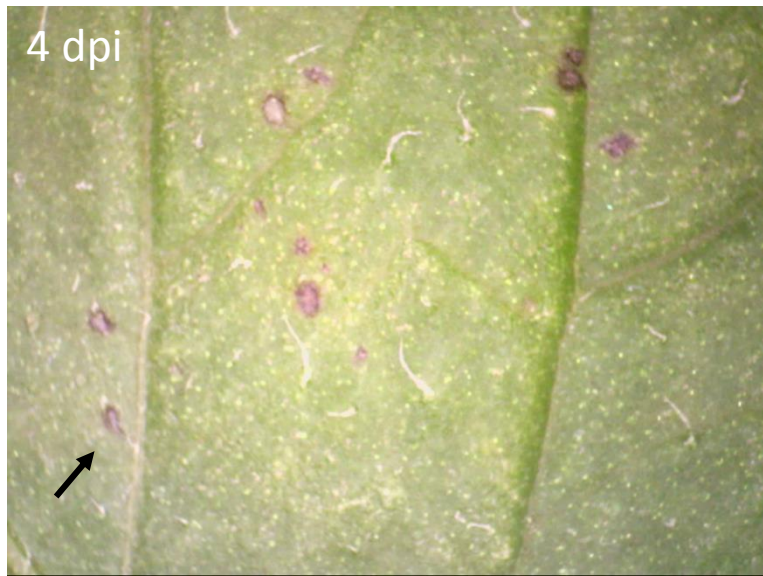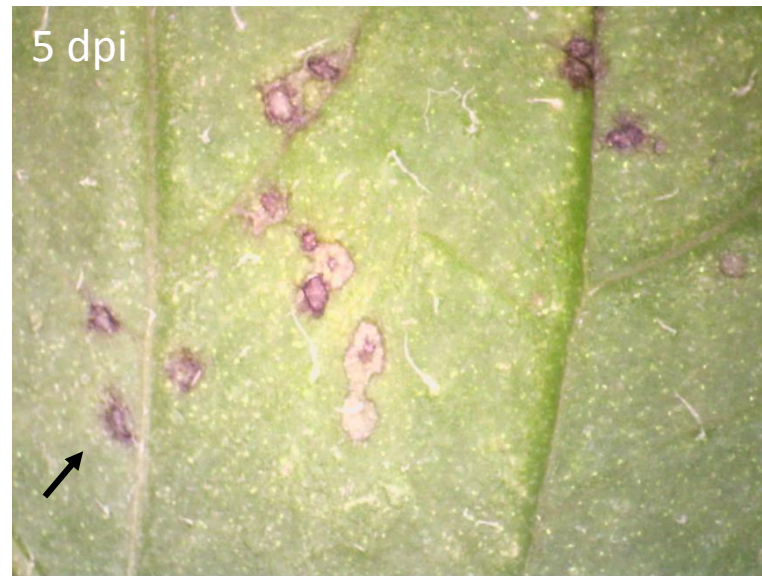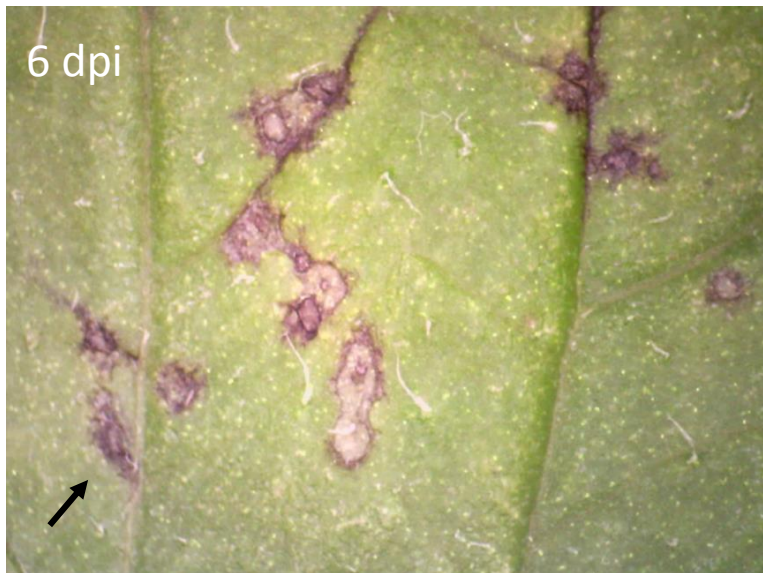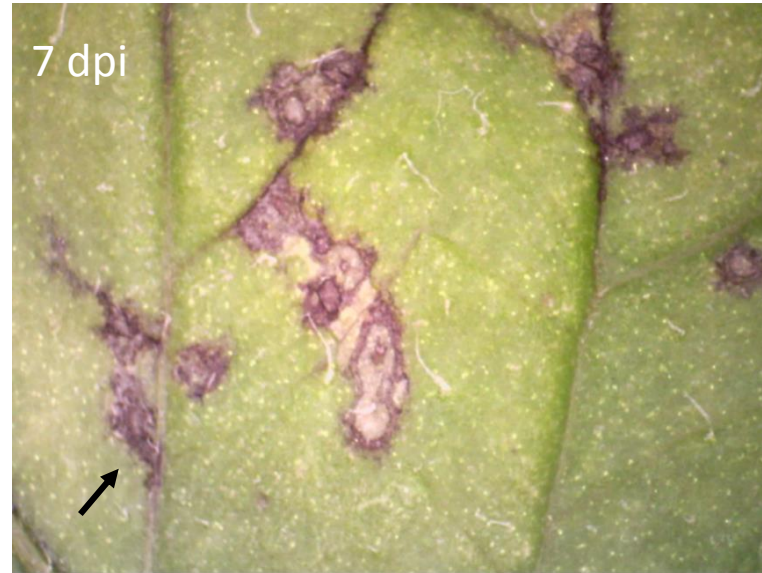

cv. Rywal  
Experiment 8  
4 dpi – 7 dpi

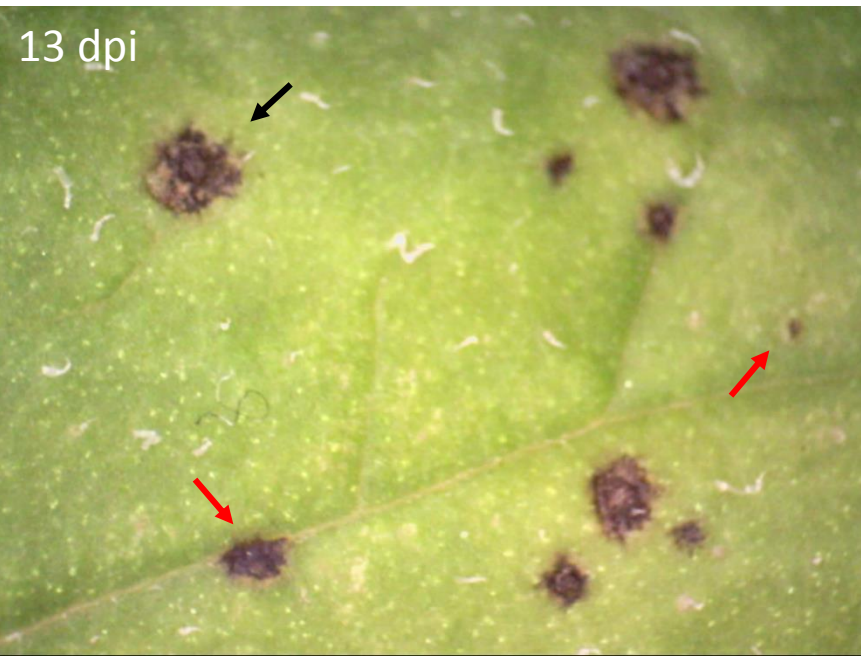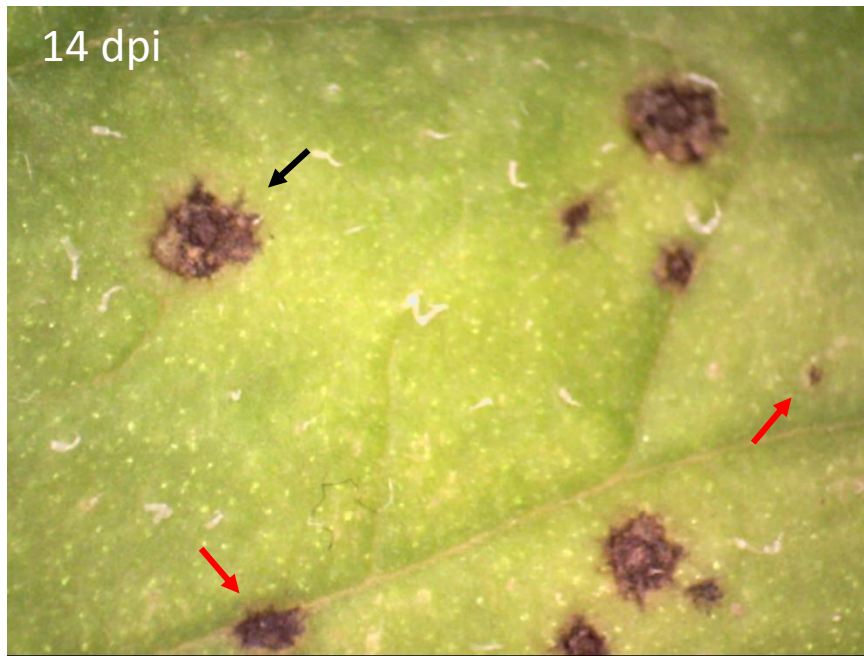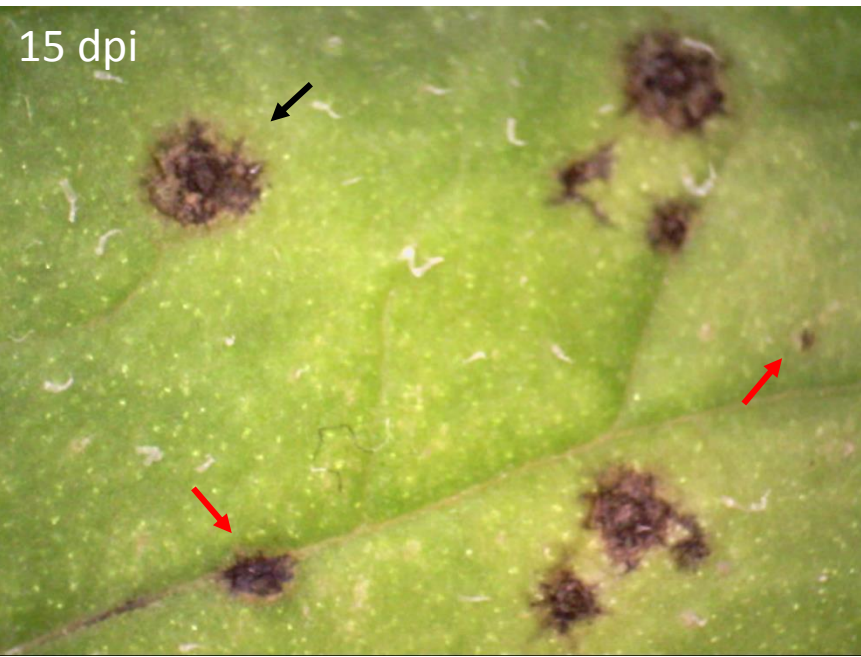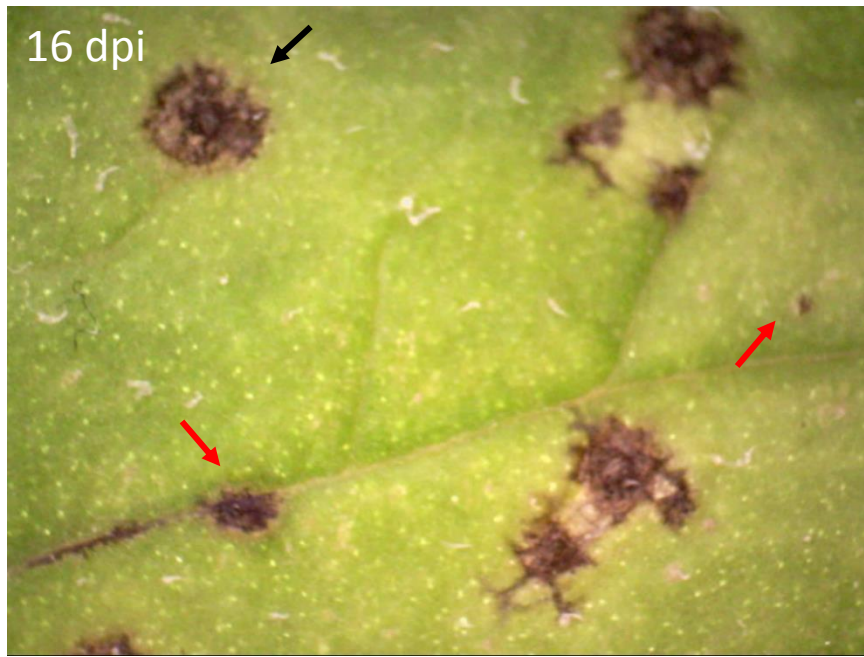

cv. Rywal  
Experiment 9  
13 dpi – 16 dpi

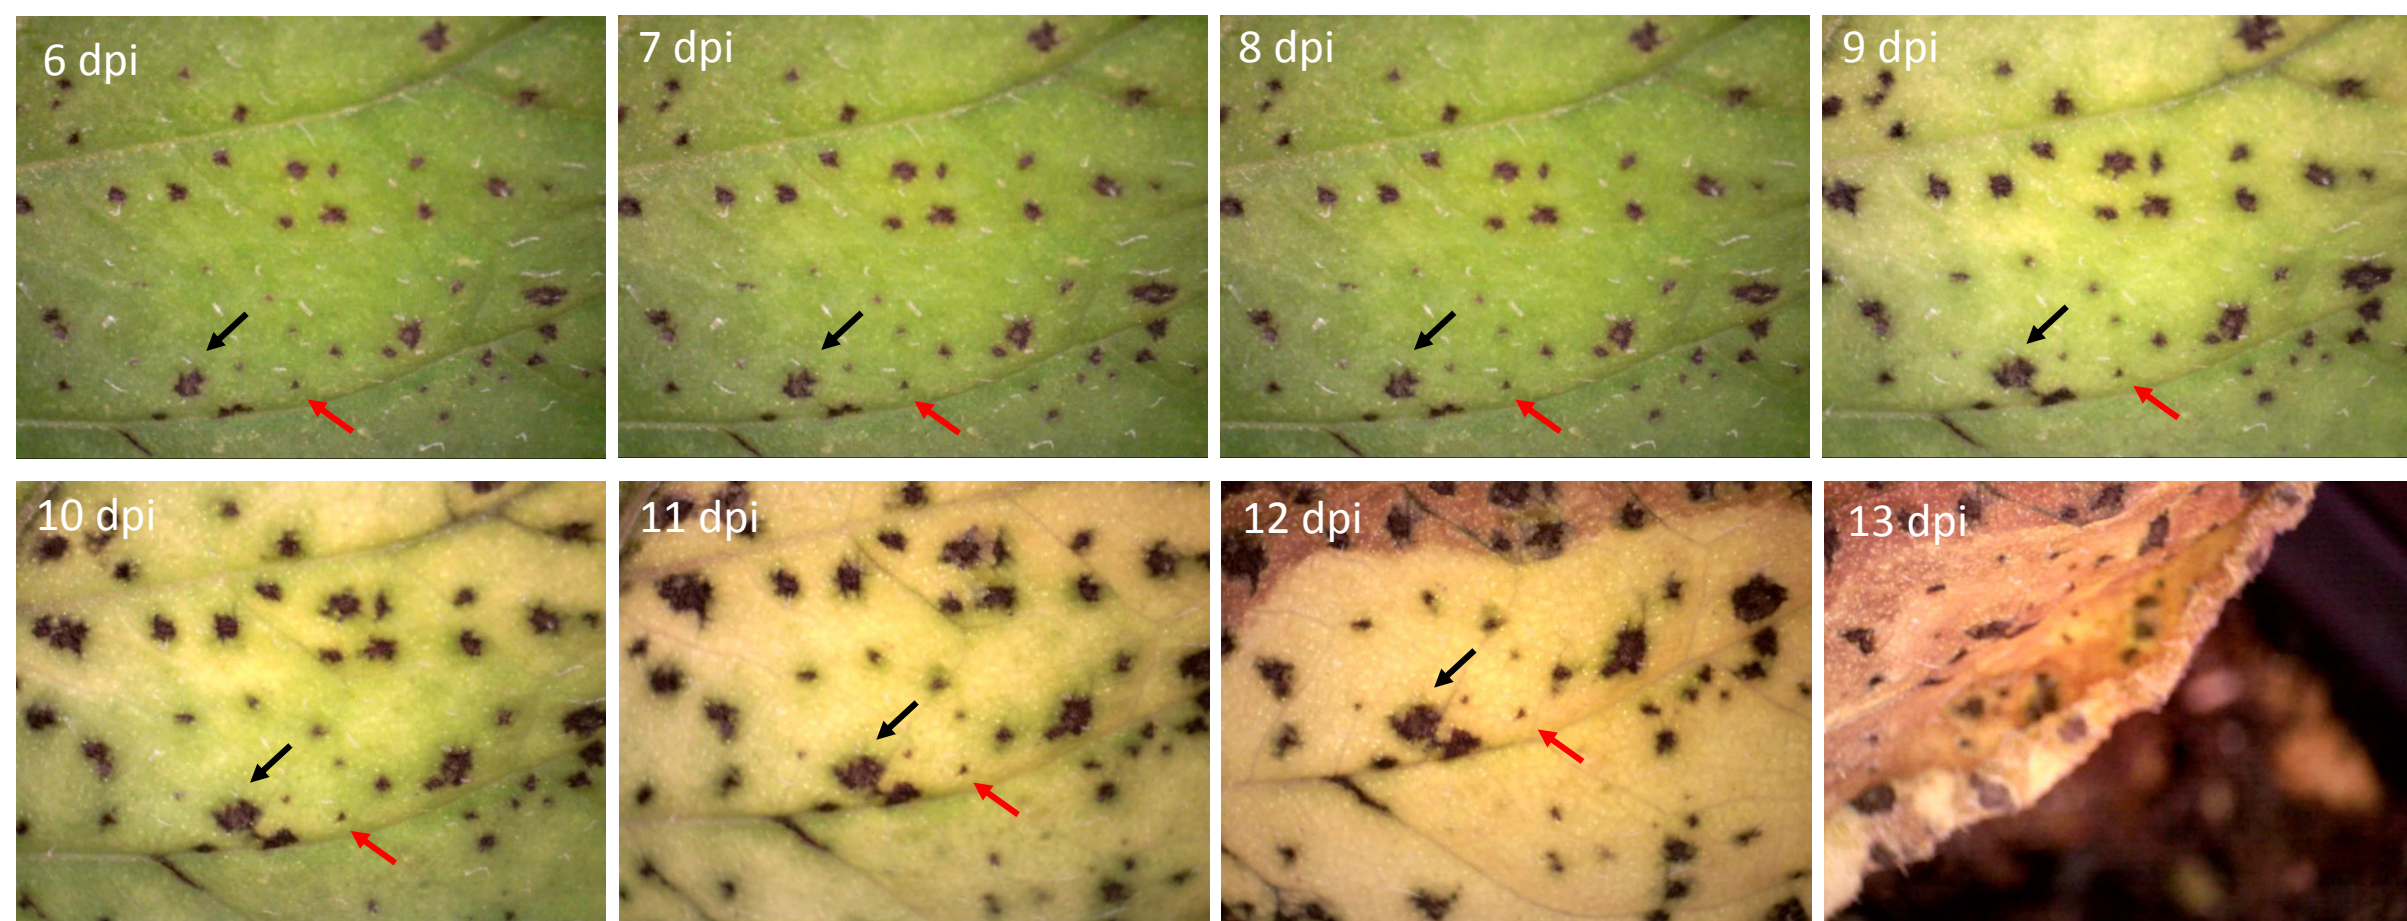

cv. Rywal  
Experiment 10  
6 dpi – 13 dpi

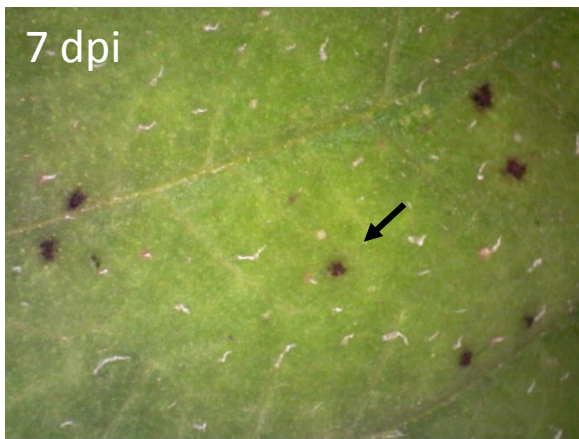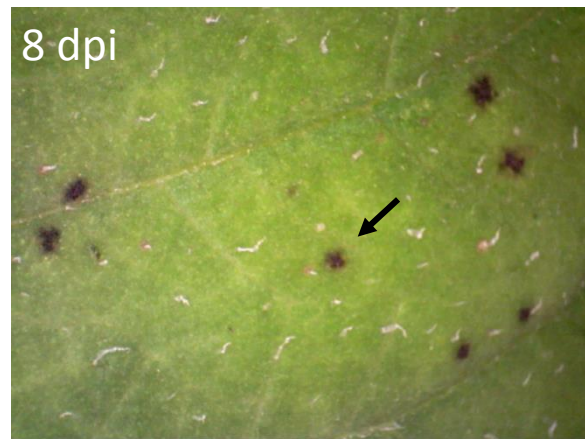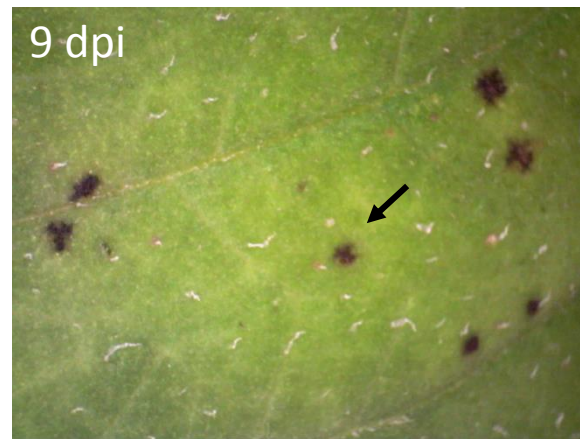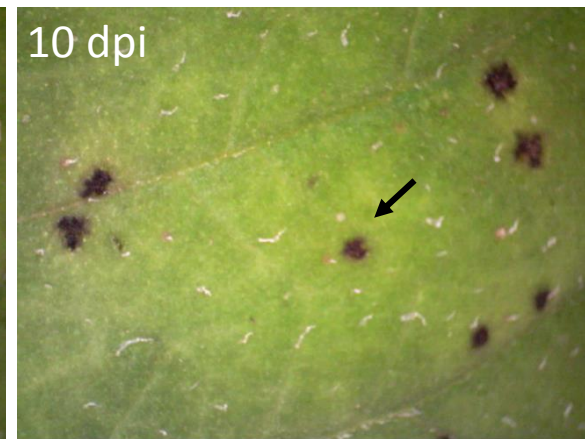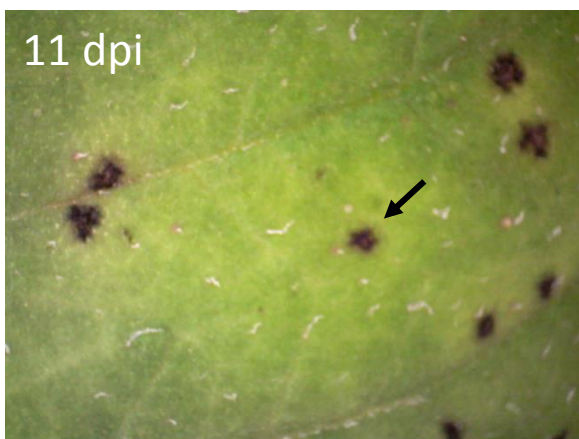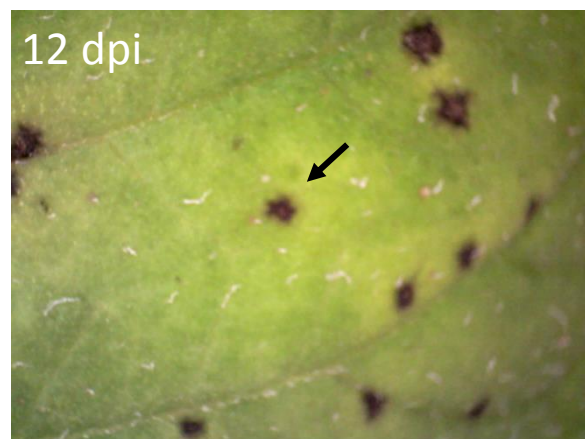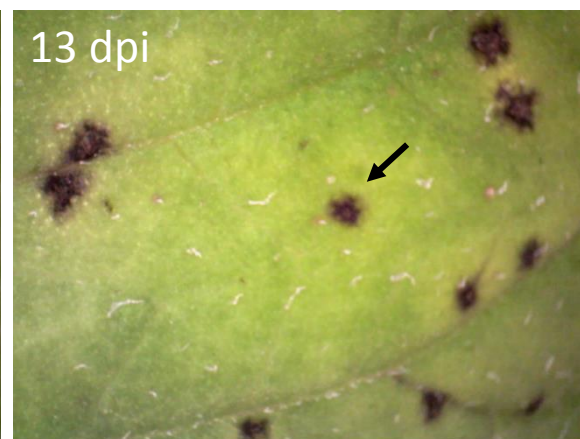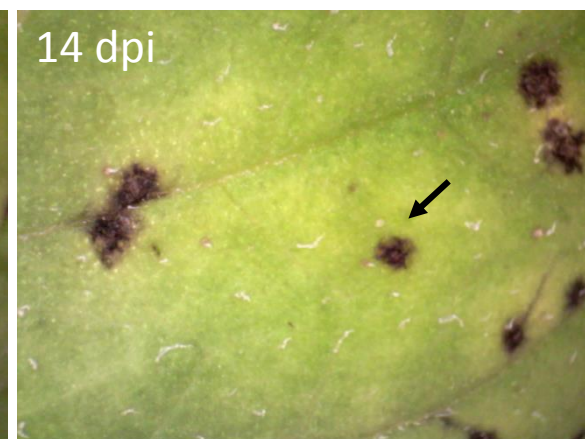

cv. Rywal  
Experiment 11  
7 dpi – 14 dpi

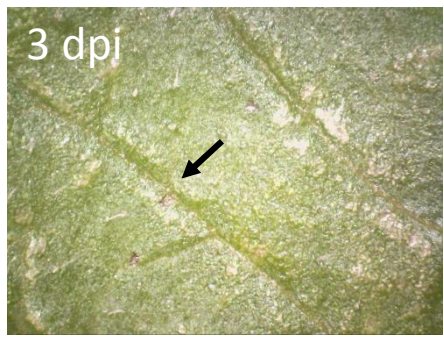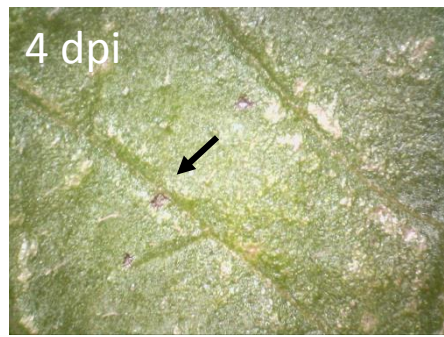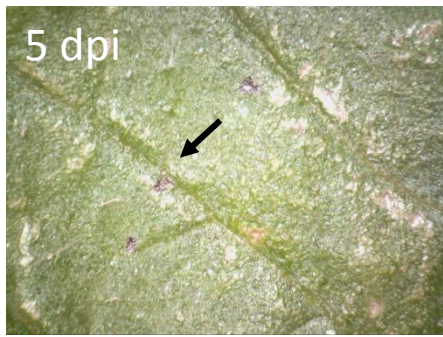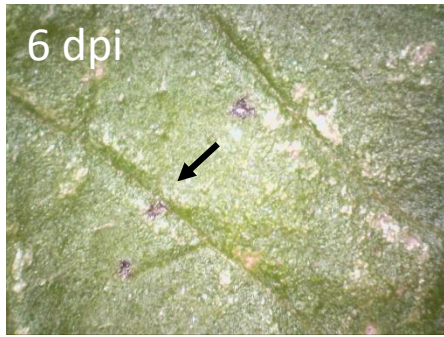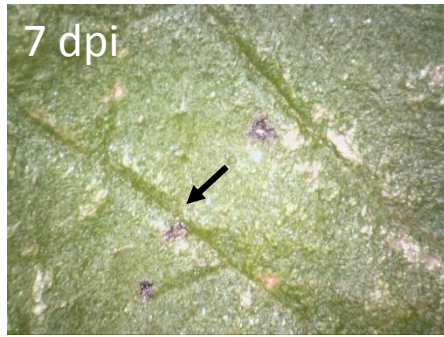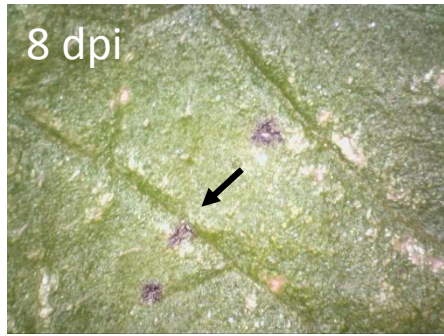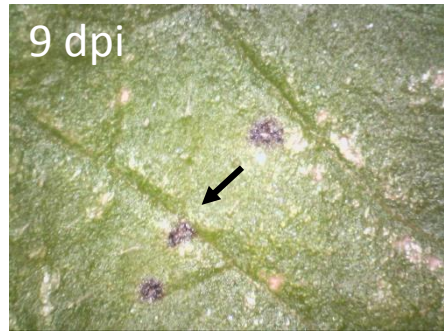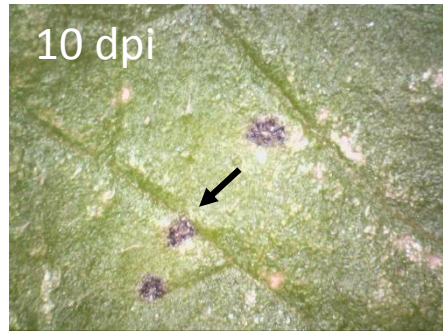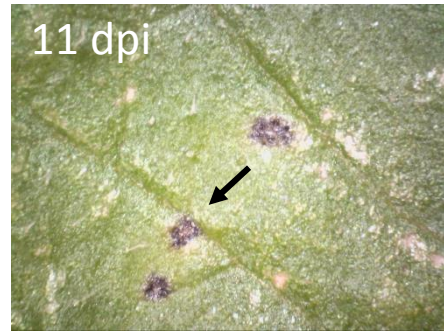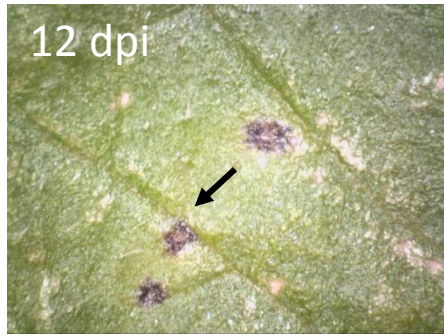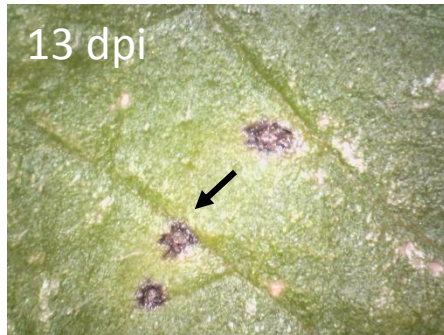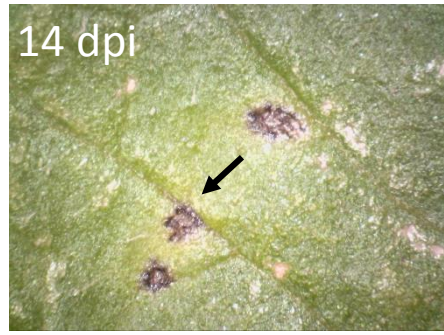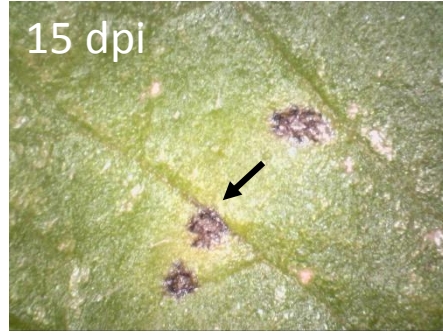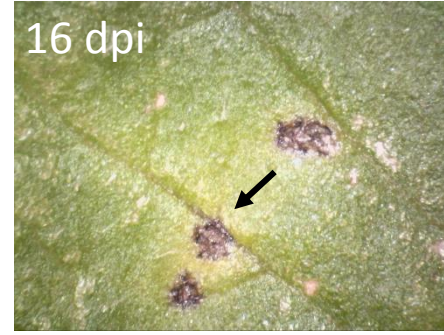

cv. Rywal  
Experiment 12  
3 dpi – 16 dpi

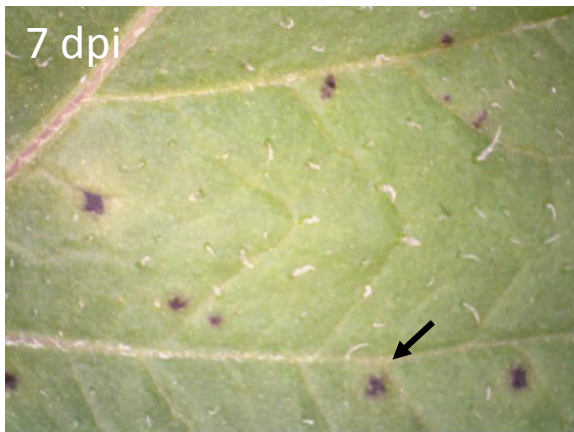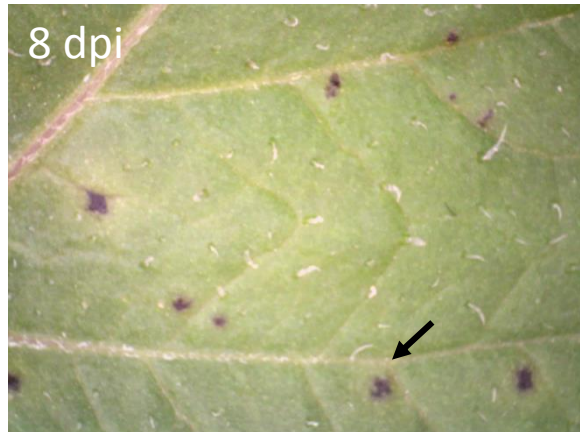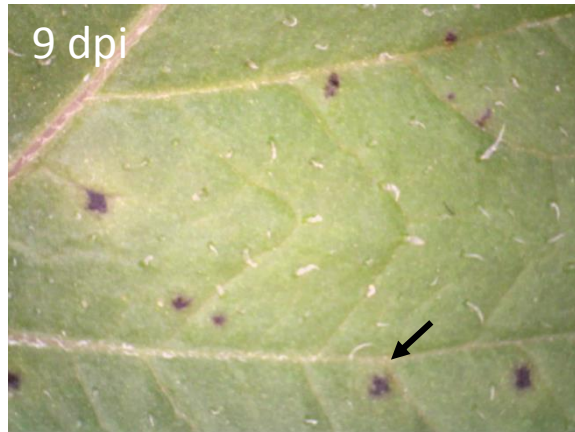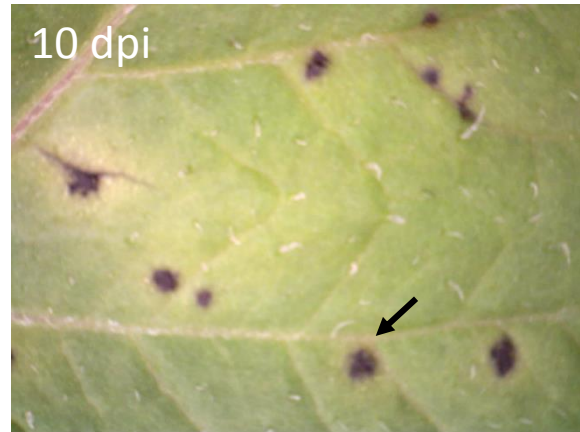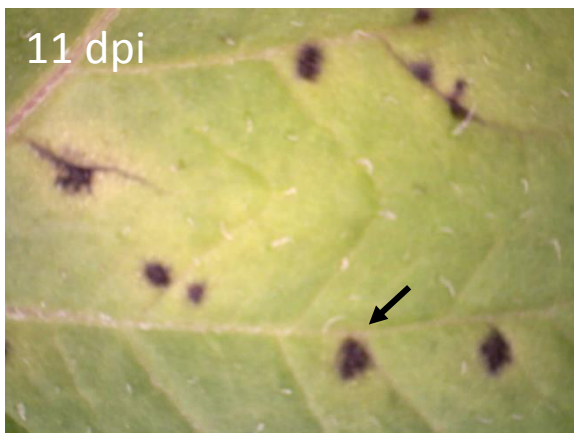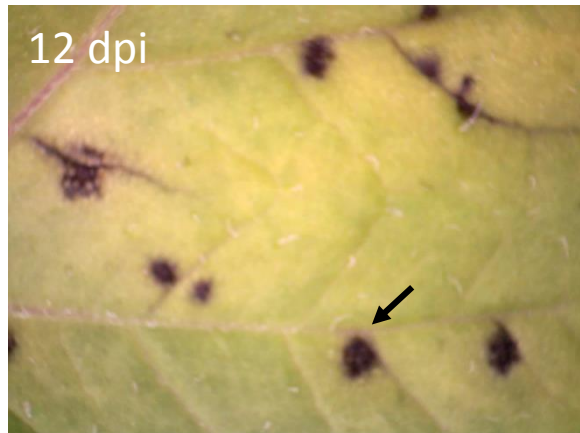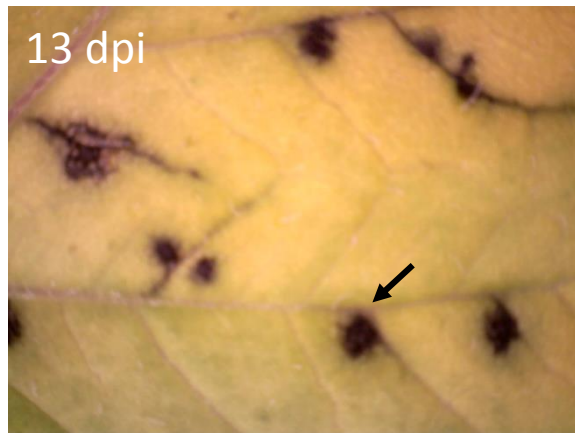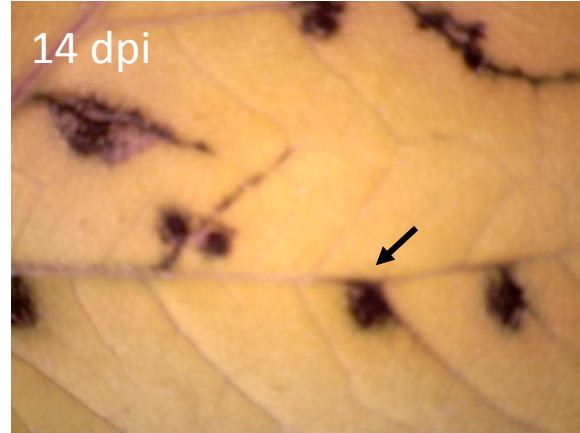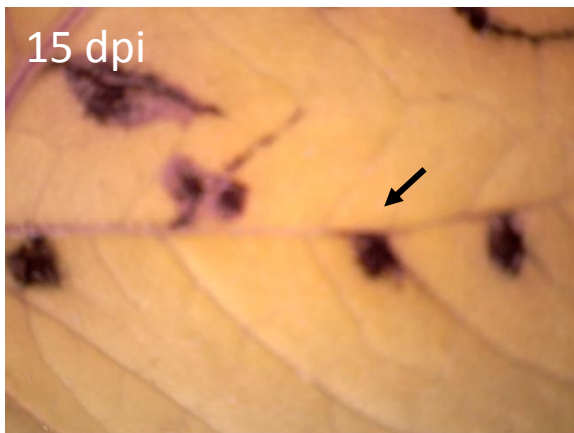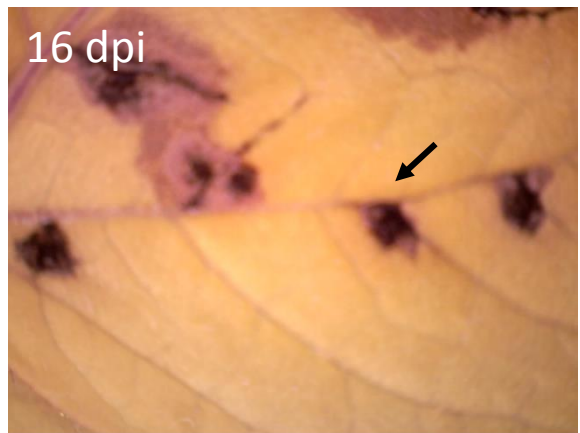

cv. Rywal  
Experiment 13  
7 dpi – 16 dpi
